July 1, 2021

1 **A model of rapid homeostatic plasticity accounts for hidden, long-lasting**  
2 **changes in a neuronal circuit after exposure to high potassium.**

3

4 Mara C.P. Rue<sup>^</sup>, Leandro Alonso<sup>^</sup> and Eve Marder\*

5

6 Biology Department and Volen Center, Brandeis University, Waltham, MA 02454

7 \*Corresponding author, Eve Marder: [marder@brandeis.edu](mailto:marder@brandeis.edu)

8 <sup>^</sup>These authors contributed equally to the work

9

10 Number of pages: 33

11 Number of figures: 6

12 Abstract: 146 words

13

14 Introduction: 648 words

15 Results: 3,312 words

16 Discussion: 1,545 words

17 Total words: 5,505 words

18

19 The authors declare no conflicts of interest.

20 Funding: Supported by NIH R35 NS097343 (EM, LA) and F31-NS113383 (MR)

21

22 Short title: Model of Adaptation to Multiple High K<sup>+</sup>

23

24 Keywords: *Cancer borealis*; neuronal oscillators; stomatogastric ganglion, homeostasis

July 1, 2021

25 **Abstract**

26 Neural circuits must both function reliably and flexibly adapt to changes in their  
27 environment. We studied how both biological neurons and computational models  
28 respond to high potassium concentrations. Pyloric neurons of the crab stomatogastric  
29 ganglion (STG) initially become quiescent, then recover spiking activity in high  
30 potassium saline. The neurons retain this adaptation and recover more rapidly in  
31 subsequent high potassium applications, even after hours in control saline. We  
32 constructed a novel activity-dependent computational model that qualitatively captures  
33 these results. In this model, regulation of conductances is gated on and off depending on  
34 how far the neuron is from its target activity. This allows the model neuron to retain a  
35 trace of past perturbations even after it returns to its target activity in control  
36 conditions. Thus, perturbation, followed by recovery of normal activity, can hide cryptic  
37 changes in neuronal properties that are only revealed by subsequent perturbations.

38

July 1, 2021

39

## 40 **Introduction**

41 An enigmatic property that all nervous systems share is their ability to maintain  
42 proper physiological function despite ongoing perturbations to their activity and  
43 constant turnover of their ion channels and other cellular components. At the same  
44 time, neural circuits must be able to adapt to varying internal and external  
45 environments.

46 For all organisms, maintaining the appropriate ionic composition of the  
47 extracellular milieu is critical for normal physiological function, and the potassium  
48 gradient is particularly important for the maintenance of resting membrane potential  
49 and normal activity levels. It is therefore unsurprising that altered potassium  
50 homeostasis occurs in a wide array of conditions including heart disease, kidney failure,  
51 thermal stress, epilepsy, traumatic brain injury and stroke<sup>1-7</sup>. In addition to these  
52 pathological disease states, altered extracellular potassium levels are routinely used by  
53 researchers as a physiologically relevant depolarizing stimulus to increase neuronal  
54 activity or as a proxy for excitatory inputs<sup>8-11</sup>. Nonetheless, many studies employing  
55 high potassium do not record the physiological response of neurons. Those that do  
56 record physiologically often look only at long-term, chronic changes of populations of  
57 neurons over days to weeks<sup>12-14</sup>. But changing extracellular potassium concentration will  
58 immediately affect neuronal membrane potentials, and thus may activate rapid  
59 adaptation mechanisms. Given this, we were interested to observe how elevations in  
60 extracellular potassium levels would affect individual neurons over time.

61 By studying how extracellular potassium concentrations affect identified  
62 neurons, we have an opportunity to observe mechanisms of adaptation to a global

July 1, 2021

63 depolarization. Typically, researchers classify activity-dependent adaptation into several  
64 distinct timescales. The shortest activity-dependent adaptation processes such as spike  
65 frequency adaptation emerge from ion channel properties that occur on the millisecond  
66 timescale. Over longer timeframes, activity-dependent homeostatic mechanisms actively  
67 regulate ion channel expression and synaptic weights to maintain stable function in the  
68 face of physiological perturbation<sup>15-25</sup>. These homeostatic processes are commonly  
69 thought to act over hours to days and require protein synthesis. However, similar  
70 feedback mechanisms can also drive more rapid adaptation over intermediate  
71 timescales on the order of minutes. For instance, changes in *effective* conductance  
72 density can occur quickly through phosphorylation of ion channels<sup>26-28</sup> or rapid  
73 insertion of ion channels<sup>29</sup>.

74       Models of activity-dependent plasticity or homeostasis generally involve feedback  
75 mechanisms that monitor internal calcium dynamics to modify the conductance  
76 densities of specific ion channels. Using these rules, one can build neurons with given  
77 target activities that can recover from perturbation<sup>23, 30</sup>. However, all current models of  
78 homeostatic plasticity have some limitations. For instance, in models using a single  
79 calcium sensor, neurons can be robust to some perturbations, but vulnerable to targeted  
80 deletion or changes in specific conductances<sup>31</sup>. Conversely, models involving more than  
81 one calcium sensor can be inherently unstable<sup>23, 30</sup>. Finally, conventional computational  
82 models of neurons are far more vulnerable to perturbation than biological neurons<sup>20, 23,</sup>  
83 <sup>30, 32-34</sup>. This suggests that some mechanisms of activity-dependent adaptation must be  
84 included in computational models to study how neurons respond to perturbations.

85       The crustacean stomatogastric ganglion (STG) is an excellent model system in  
86 which to study underlying network dynamics and mechanisms of circuit robustness both

July 1, 2021

87 through recording from well-studied identified neurons and computational models of  
88 those neurons<sup>33, 35-38</sup>. Importantly, the physiological behavior of each neuron within the  
89 STG is relatively stereotyped, allowing us to determine whether a given pattern of  
90 activity is normal. This system therefore provides an excellent paradigm in which to  
91 study how a neural circuit can achieve stable adaptation to global perturbation while  
92 maintaining its characteristic physiological function. Taking advantage of this tractable  
93 and well-defined system, we investigated the response of neurons to high potassium and  
94 describe a case of intermediate-term (minutes) adaptation to a global perturbation  
95 which is retained over long time periods (hours). We then used these observations to  
96 modify a computational model of homeostatic adaptation. These studies demonstrate a  
97 mechanism by which adaptation can lead to cryptic changes in neuronal excitability that  
98 become visible only in response to a subsequent environmental challenge.

July 1, 2021

## 99 **Results**

### 100 *Short-term adaption of pyloric neurons to elevated potassium concentrations*

101 The pyloric central pattern generator within the STG drives filtering of food  
102 particles through the foregut *in vivo*<sup>39</sup>. The same network activity persists *in vitro*<sup>40</sup>  
103 and can be monitored using a combination of intracellular and extracellular recordings.  
104 The pyloric network is driven by the anterior burster (AB) neuron together with the two  
105 pyloric dilator (PD) neurons, which together form a pacemaker kernel. In this study we  
106 focused on the regular bursting activity of the PD neuron as a proxy for robustness of  
107 the pyloric circuit (Fig. 1a(i)). For all experiments, the stomatogastric nervous system  
108 (STNS) was dissected intact from the stomach of the crab, *Cancer borealis*, and pinned  
109 in a dish, allowing us to change the composition of continuously superfused saline.

110 We previously demonstrated that pyloric neurons depolarize, temporarily  
111 become silent in high potassium saline, and subsequently recover spiking activity  
112 through a change in cell-intrinsic excitability<sup>38</sup>. In this work we studied repeated  
113 applications of high potassium to ask if neurons retain a long-term trace or memory of  
114 this adaptation. When PD neurons are first exposed to 2.5 times the physiological  
115 concentration of extracellular potassium (2.5x[K<sup>+</sup>] saline), the neuron depolarizes and  
116 becomes quiescent (Fig. 1a(ii)) before recovering spiking and later bursting activity over  
117 20 minutes in elevated extracellular potassium (Fig. 1a(iii-v)). This change in activity can  
118 be visualized by the raw voltage traces (Fig. 1a, top) and simple raster plots where a line  
119 is plotted for each action potential in the respective PD neuron (Fig. 1a, bottom).

120 We superfused the STNS with three 20-minute 2.5x[K<sup>+</sup>] saline exposures  
121 interspersed with 20-minute washes in physiological (control) saline (Fig. 1b). Repeated  
122 exposure to elevated extracellular potassium resulted in shorter or diminished periods

July 1, 2021

123 of quiescence and more robust PD neuron spiking activity compared to the initial  
124 application (Fig. 1b, c). In all animals (N=14), PD neurons exhibited more spiking and  
125 bursting behavior in high [K<sup>+</sup>] applications #2 and #3 compared to the first application  
126 (Fig. 1d, Friedman's test,  $Q(2) = 23.57$ , multiple comparisons with Bonferroni  
127 correction. The number of spikes during the first application differs from second and  
128 third for minutes 4 – 13 after beginning of application ( $p < 0.0025$  for all)). Nonetheless,  
129 significant individual variability can also be observed across animals.

130 Under normal physiological conditions, pyloric neurons produce bursts of action  
131 potentials, which are necessary to drive rhythmic contractions of muscles within the  
132 stomach of the crab<sup>41</sup>. Therefore, we also characterized the “burstiness” of pyloric  
133 neurons during exposure to high potassium saline using Hartigan's dip statistic, in  
134 which higher numbers indicate more burst-like activity. For all PD neurons, the dip  
135 statistic was higher throughout the second and third high potassium applications  
136 compared to the first (Fig. 1e, Friedman's test,  $Q(2) = 16.87$ , multiple comparisons with  
137 Bonferroni correction. Dip value during the first application differs from second and  
138 third for minutes 6 – 12 after beginning of application ( $p < 0.005$  for all)). Overall, the  
139 improved spiking activity and “burstiness” of PD neurons in high potassium saline upon  
140 repeated applications indicates that the intrinsic properties of pyloric neurons are  
141 altered by a single exposure to high potassium, and that these changes are maintained  
142 after 20-minute washes in control saline.

143

144 *Pyloric activity in control saline is unchanged following potassium perturbation*

145 Given that pyloric neurons rapidly adapt to the high potassium perturbation, we  
146 might expect that this change in excitability would affect the neurons' overall activity

July 1, 2021

147 level. To see if this was the case, we directly compared the bursting activity of each PD  
148 neuron in control saline and after each high potassium application (Wash #1-3). Figure  
149 2a depicts example traces from PD neurons from three preparations. Here the animal  
150 number to the left corresponds to the animal numbers shown in Figure 1. Although all  
151 the PD neurons shown here had distinct sensitivities to high potassium saline (see Fig.  
152 1c), the baseline activity of the neurons is similar across animals. Additionally, within  
153 each preparation the activity in the washes appears similar to baseline. For all PD  
154 neurons, we analyzed the bursting activity in the last ten minutes of baseline and washes  
155 #1-3. The burst frequency of PD neurons was unchanged in control saline regardless of  
156 the wash number (Fig. 2b, Friedman's test,  $Q(3) = 2.45$ ,  $p = 0.46$ ). Similarly, there was  
157 no change in the average number of spikes per burst (Fig. 2c, Friedman's test  $Q(3) =$   
158  $4.66$ ,  $p = 0.17$ ). In summary, although PD neurons show robust adaptation to high  
159 potassium saline, we observe no differences in bursting behavior under control  
160 conditions.

161

162 *Adaptation to elevated potassium is maintained long-term after several hours in*  
163 *control saline*

164 Because our potassium applications are relatively brief, one might expect a PD  
165 neuron to return to their baseline sensitivity after a period of time under control  
166 conditions and lose the enhanced robustness to high potassium saline.

167 To test this, we performed additional experiments in which we applied the same  
168 three rapid 20-minute applications of  $2.5x[K^+]$  saline interspersed with 20-minute  
169 washes in control saline, followed by a three-hour wash, and finally a fourth 20-minute  
170  $2.5x[K^+]$  saline application. Here, unlike in the previous set of experiments, the third



July 1, 2021

171 wash is many times longer than the perturbation that drove the change in robustness.  
172 Again, PD neurons showed improved robustness over the first three applications of high  
173 potassium saline (example traces of activity at 15 minutes in 2.5x[K<sup>+</sup>] saline, Fig. 3Aii,  
174 iii, iv). After the three-hour wash in control saline, the representative PD neuron  
175 (animal 15) shown in Figure 3a maintained and improved this robust response to  
176 2.5x[K<sup>+</sup>] saline (Fig. 3av, 3b). All PD neurons in this set of six experiments retained their  
177 decreased sensitivity to high potassium saline after extended wash (Fig. 3c). Overall, the  
178 number of spikes per minute in 2.5x[K<sup>+</sup>] saline increased across the first three  
179 applications, and was maintained in the fourth application after the extended wash (Fig.  
180 3d, Friedman's test  $Q(3) = 18.54$ , multiple comparisons with Bonferroni correction. The  
181 number of spikes per minute during the first application differs from second, third and  
182 fourth for minutes 2 – 14 after beginning of application ( $p < 0.0025$  for all)). PD neurons  
183 exhibited more bursting activity in high potassium saline in applications #2-4 compared  
184 to the first (Fig. 3e, Friedman's test  $Q(3) = 10.39$ , multiple comparisons with Bonferroni  
185 correction. Dip statistic during the first application differs from second, third and fourth  
186 for minutes 2 – 12 after beginning of application ( $p < 0.005$  for all)). Thus, pyloric  
187 neurons retain an imprint of past exposures to high potassium saline, even after a wash  
188 period much longer than the perturbation itself and despite the fact that unperturbed  
189 recordings show little overt sign of this adaptation.

190

### 191 *Modeling bursting neurons exposed to high potassium*

192 We constructed a computational model of a neuron that captures the main qualitative  
193 observations in the previous experiments, and which reveals features of adaptation  
194 mechanisms that are difficult to see directly. To this end, we evaluate how several

July 1, 2021

195 models with different long-term regulation properties respond to the same high  
196 potassium perturbation. These include (a) a conventional conductance-based model  
197 with no regulation, (b) a three-sensor homeostatic model modified from Liu et al  
198 (1998)<sup>30</sup>, and (c) a new three-sensor homeostatic model with novel conductance  
199 regulation properties. Figure 4 shows simulations in which we applied the high  
200 potassium perturbation (shifted  $E_K$  from -80mV to -40mV) to the three different model  
201 neurons in intervals of 20 minutes. We also simulated a long wash period of 3 hours,  
202 followed by a final 20-minute application of high potassium, similar to the experiments  
203 in Figure 3. For all panels, the membrane potential is shown on top, and the  
204 conductance densities of the currents are shown below. The numerals below the voltage  
205 trace indicate the type of activity pattern (Fig. 4*i-iv*) at different temporal segments.

206

207 *The model neuron becomes quiescent in the first exposure to high potassium*

208 Figure 4a depicts a conventional conductance-based neuronal model. In this  
209 model, when the potassium reversal potential is changed the membrane potential  
210 depolarizes and the cell becomes quiescent. The model remains quiescent during the  
211 high potassium condition, recovers bursting activity in wash, and unsurprisingly, the  
212 model does not adapt and becomes quiescent again when subsequently exposed. This  
213 simulation strongly suggests that to replicate the experimental data the conductance  
214 densities in the model neuron must change. Note that the maximal conductances in this  
215 model do not change over time.

216

217 *A homeostatic model with bounded current densities can rapidly adapt to the high*

218 *potassium perturbation, but does not retain a long-term memory*

July 1, 2021

219 This led us to revisit a family of models with homeostatic regulation that have  
220 been used for many years to understand how neurons develop proper bursting behavior  
221 and adapt to changes in the environment <sup>20, 30, 34, 42</sup>. We devised a modification of the  
222 model by Liu et al. <sup>30</sup> which uses three sensors (fast, slow and DC filter of the calcium  
223 current) that monitor calcium currents and employs them to modify the neuron's  
224 effective conductance densities and achieve a target activity. The model can be  
225 expressed as follows,

$$226 \quad \tau_g \dot{\mathbf{g}} = \mathbf{A} \delta \mathbf{g}. \quad (1)$$

227

228 Here  $\mathbf{A}$  is a fixed matrix that defines how the sensor outputs translate into conductance  
229 changes.  $\delta(t)$  is a vector that measures how close each sensor is to its set point (see  
230 methods). Ideally, the conductances stay constant when all components  $\delta_i = 0$ , which  
231 occurs when each sensor is at its set point. This model can recover from several  
232 perturbations including changes in the reversal potential of potassium currents <sup>43</sup>.  
233 However, one drawback of model as implemented in Liu et al. <sup>30</sup> is that if all three  
234 sensors are not satisfied at the same time, this can result in run-away activity which  
235 leads conductances to increase rapidly, causing it to diverge <sup>30, 43</sup>. In other words, over  
236 long time periods model (1) will often become unstable. Despite this limitation, the  
237 three sensors are useful in distinguishing between different patterns of activity. For  
238 example, in the case of a neuron with a periodically bursting target activity, a  
239 perturbation could switch the activity to a tonic spiking state. For the cell to recover  
240 back to the bursting state, it must be able to sense a difference between the bursting  
241 state and the tonic spiking state. As Liu et al. <sup>30</sup> shows, when using only one calcium  
242 sensor it is not always possible to tease apart these two activity patterns because the

July 1, 2021

243 average calcium in the model cell can be similar in both regimes. In this situation the  
244 conductances would stay constant and the model neuron would not recover from such a  
245 perturbation. The high extracellular potassium perturbation studied here runs into the  
246 same difficulty: the average calcium levels in the cell during bursting in control and the  
247 quiescent state in high potassium saline are similar. Therefore, we sought a modification  
248 of the model that would allow it to operate in a stable fashion with the multiple sensors  
249 needed to distinguish tonic spiking from bursting activity.

250 Hence, we incorporated explicitly in this model the biological assumption that  
251 conductances can't grow indefinitely and must be bounded by some maximum value.  
252 This modification prevents the model from diverging, but preserves many of its  
253 properties such as the possibility of recovering spiking during the high potassium  
254 condition,

255

$$256 \quad \tau_g \dot{g} = \mathbf{A}\delta g - \gamma g^3. \quad (2)$$

257

258 With this modification, model (2) will respond to perturbations in a similar way as the  
259 original formulation ( $\gamma = 0$ ) unless some conductances are too large. If  $g$  is too large,  
260 the cubic term will dominate and  $\dot{g} < 0$ , meaning that  $g$  will decrease. The parameter  
261  $\gamma$  can be used to set a bound for how much a conductance can grow. We chose a cubic  
262 term for simplicity but note that any function that satisfies  $\dot{g} < 0$  for  $g$  sufficiently large  
263 would prevent the model from diverging.

264 Model (2), Figure 4b, retains a transient memory of prior adaptation to high  
265 potassium saline. There are multiple regions in conductance space that correspond to  
266 bursting patterns under control and wash conditions, but our recovery mechanism

July 1, 2021

267 favors some regions over others because of the details of the control scheme and other  
268 parameters (See Methods) <sup>43</sup>. When model (2) is returned to the control condition after  
269 the first high potassium exposure (wash), the values of the conductances and the  
270 bursting waveform are slightly different from those before the first exposure (compare  
271 Fig. 4*i* and 4*iv*) As time unfolds in control saline, the conductances trend back to their  
272 starting values. Because of our chosen timescale for conductance changes,  $\tau_G =$   
273 2 minutes, over the 20-minute wash period the conductances do not reach their original  
274 set-points. Therefore, over the first three applications of high potassium saline in Figure  
275 4b, the neuron is more robust to the second and third application compared to the first.  
276 Nevertheless, the conductances will trend back to their starting values if given sufficient  
277 time, as happens in the long three-hour wash period. For this reason, in Figure 4b the  
278 response to high potassium in the fourth application of high potassium is akin to the  
279 first response. This contrasts with the biological data showing that PD neurons can  
280 maintain robustness to the high potassium perturbation over a long wash period (Fig.  
281 3).

282

283 *Addition of a novel activity-dependent gating mechanism for homeostatic plasticity*  
284 *allows the model neuron to retain long-term memory of past perturbation*

285 To allow the model neuron to retain its adaptation to previous perturbations, we  
286 next wanted to enforce the condition that the bursting patterns in control (Fig. 4*i*) and  
287 in wash (Fig. 4*iv*) are equally acceptable, and that the cells' conductances need not drift  
288 back to their starting values. In the model by Liu et al. <sup>30</sup>, the readings from the three  
289 sensors are used to drive changes in conductances; equilibrium is expected when the  
290 sensors are simultaneously at their set points. In a sense, the sensors in this model are

July 1, 2021

291 playing a dual role: they drive changes in conductances in a specific way, and they also  
292 monitor that the cell is at its target pattern, because the equilibrium condition ( $\dot{\mathbf{g}} = \mathbf{0}$ )  
293 requires all sensors to be at their set points. Here we explored a new modification: that  
294 the specific way in which the model modifies its conductances is independent of the  
295 equilibrium condition. In this way, we incorporate the possibility that there are two  
296 pathways: one that drives changes in the conductances (possibly but not necessarily  
297 using sensor readings), and another that controls whether the regulation mechanism is  
298 active or not. For this we hypothesized that there is a feedback signal that combines the  
299 readings of the sensors, and that this signal modulates the timescale of conductance  
300 regulation. We implemented this idea using a state variable  $\alpha$  that takes values between  
301 zero and one. If the model is bursting periodically, the feedback signal is high and  $\alpha \rightarrow$   
302 0. If the feedback signal is low and the model's activity is other than the target pattern,  
303 then  $\alpha \rightarrow 1$ .

304

$$305 \quad \tau_g \dot{\mathbf{g}} = \{\mathbf{A}\delta\mathbf{g} - \gamma\mathbf{g}^3\} \alpha(t). \quad (3)$$

306

307 Figure 4c shows a simulation of model (3) subjected to the same experimental paradigm  
308 as before. In control conditions the feedback signal is high ( $\alpha \approx 0$ ), so the conductances  
309 stay constant until the first exposure to high potassium. When the cell becomes  
310 quiescent, the feedback signal is low ( $\alpha \approx 1$ ), so the recovery mechanism is activated  
311 similarly to Fig. 4b and allows the cell to recover spiking activity in high potassium  
312 saline. As before, the cell recovers bursting upon wash, but now the feedback signal is  
313 high, and the recovery mechanism is turned off ( $\alpha \approx 0$ ). Instead of returning to their

July 1, 2021

314 control values the conductances stay constant during the wash intervals regardless of  
315 the duration of the wash period. In this way, model (3) will remain robust to the high  
316 potassium saline application after a long wash period, and for this reason response to  
317 perturbation in application four is different from that in the first application.

318

319 *Time course of recovery in high potassium depends on starting conductance densities*

320 In our experiments, the amount of time it takes for PD neurons to recover spiking  
321 activity upon the first exposure to high potassium saline varies widely across animals;  
322 some neurons regain spiking almost immediately while others remain silent for almost  
323 20 minutes (Fig. 1c). In identified neurons from the STG, mRNA copy number for ion  
324 channels and recorded currents can vary 2 to 6-fold across individuals<sup>44-48</sup>. Therefore,  
325 one way to account for the variability in recovery time is to assume that individual  
326 differences between PD neurons determine the sensitivity to high potassium saline. To  
327 test this hypothesis, we used our newly devised model (3) to investigate whether  
328 individual differences in conductance density between neurons may be sufficient to  
329 explain the observed variability.

330 We generated 9 model neurons that use the same adaptation mechanisms as  
331 model (3). Previous studies have demonstrated that model neurons with different  
332 underlying parameters can nonetheless have similar activity patterns<sup>23, 33, 49</sup>, and we  
333 replicate these findings here. Figure 5 shows the response of five representative model  
334 neurons (models P, Q, R, S and T) to the high potassium perturbation. The example  
335 traces show the membrane potential of the models in control conditions (Fig. 5a*i*) and at  
336 ten minutes into the first high potassium exposure (Fig. 5a*ii*). Note that all models  
337 exhibit similar bursting patterns of activity, although each has a different set of starting

July 1, 2021

338 conductance densities (Fig. 5a<sub>i</sub>, control conditions). The compressed membrane  
339 potential traces for each model are shown in Figure 5b. All five models become  
340 quiescent immediately after exposure to high potassium saline recover spiking activity  
341 after a variable amount of time.

342 To investigate the reasons behind this variability, we plotted the evolution of each  
343 of the conductances for the five models in Figure 5c. The recovery mechanism in each  
344 model responds differently to the same perturbation because in each case the neuron  
345 must regain spiking activity starting from a different point in conductance space. Across  
346 all models, note that the specific conductance changes in response to high potassium  
347 differ, and that in all cases the potassium conductances increase. This increase in  
348 potassium conductances makes intuitive sense, as the high potassium perturbation has  
349 the effect of reducing the driving force for all potassium currents in the model neuron.  
350 Hence, a subsequent increase in total potassium conductance might bring the neuron  
351 closer to the baseline activity state. In Figure 5c, the H conductance is not shown  
352 because  $g_H < 10^{-2} \mu S$ .

353

354 *Models with different conductance densities all retain robustness to high potassium*  
355 *saline, but specific changes in currents and recovery patterns vary*

356 For each of the 9 of models described above we simulated the entire experiment  
357 of four high potassium applications, including the long wash period between  
358 applications three and four (Figs. 3, 4). Despite the variability in time to recovery in the  
359 first high potassium application (Fig. 5), all models regained spiking activity in high  
360 potassium saline and retained this enhanced robustness over subsequent applications of  
361 high potassium saline. Figure 6 shows the membrane potential of two representative



July 1, 2021

362 models (model Q – Fig. 6a and model T, Fig. 6b) over the entire experiment. To  
363 visualize the differences in current contribution and dynamics, we plotted the  
364 currentscapes<sup>50</sup> for each model below the voltage traces at some time stamps of interest:  
365 baseline (Fig. 6*i*), 10 minutes in first high potassium application (Fig. 6*ii*), 10 minutes in  
366 the fourth high potassium application (Fig. 6*iii*) and in the final wash (Fig. 6*iv*). Because  
367 the initial conductances are different for these two models, so are the contributions of  
368 each current to the baseline activity. In model Q the control activity shows a sizeable  
369 contribution of  $I_H$ , (Fig. 6*ai*) but in model T,  $I_H$  is negligible and is replaced by larger  
370 contributions of  $I_{CaT}$ ,  $I_{CaS}$  and leak (Fig. 6*bi*) The A current,  $I_A$ , contributes substantially  
371 to the activity in model Q (Fig. 6*bi*) but its contribution in model T (Fig. 6*bi*) is small. In  
372 response to the first high potassium perturbation, both models become quiescent but  
373 model T (Fig. 6b) recovers spiking more quickly (Fig. 6*bi*).

July 1, 2021

## 374 **Discussion**

375           Neurons are long-lived cells that must perform reliably to ensure an animal's  
376 survival. However, their components such as ion channels and synaptic proteins last  
377 days to weeks and must be constantly replaced. Thus, nervous systems are both blessed  
378 and cursed with flexibility. To maintain stable function and respond appropriately to  
379 changes in the environment, neurons and neural circuits can adapt and change over  
380 timescales ranging from milliseconds to a lifetime. Therefore, there are a plethora of  
381 activity-dependent mechanisms that regulate neuronal excitability.

382           Many studies focus on homeostatic mechanisms in neural circuits involving  
383 changes in gene expression and insertion of new ion channels into the membrane,  
384 typically occurring over hours to days<sup>12, 18, 42, 51, 52</sup>. However, there are also many  
385 examples of faster adaptation, sometimes described as rapid homeostatic plasticity<sup>29, 38,</sup>  
386 <sup>53</sup>. Very rapid plasticity on the order of milliseconds to seconds, such as spike frequency  
387 adaptation or facilitation can arise from ion channel properties. These processes are  
388 critical for shaping neuronal responses, and may play a role in shaping working  
389 memory, signal transduction and many behaviors<sup>54, 55</sup>. Activity-dependent changes in  
390 excitability can also occur on the timescale of several minutes<sup>20</sup>, too long to depend on  
391 the kinetics of ion channels. On these timescales, changes in effective conductance  
392 densities can occur through calcium-dependent signaling cascades leading to  
393 phosphorylation or insertion of ion channels<sup>26, 27, 29</sup>.

394           These different activity-dependent processes, occurring on different timescales,  
395 have often been classified and segregated accordingly. However, real neurons must  
396 transition between multiple adaptation mechanisms seamlessly. This study highlights a

July 1, 2021

397 bridge between timescales of adaptation in which rapid activity-dependent adaptation to  
398 global perturbation is retained long-term.

399

400 *Rapid and long-lasting adaptation in a conductance-based neuron model*

401 In this study, we describe rapid adaptation in pyloric neurons following global  
402 depolarization by high potassium; this adaptation has a long-lasting effect on the circuit  
403 and affects the neuron's response to future high potassium applications although the  
404 baseline activity appears unchanged in control saline. To better understand how this  
405 could occur, we evaluated several computational models with different properties and  
406 their response to a high potassium perturbation. Importantly, the model of a  
407 conventional conductance-based model failed to recover spiking activity in high  
408 potassium saline (Fig. 4a). This suggests that the very rapid adaptation processes  
409 determined by ion channel properties are not sufficient to account for the response of  
410 neurons to high potassium saline. Therefore, we turned to models of homeostatic  
411 plasticity which allow conductance densities to change in an activity-dependent fashion.  
412 Recent models of homeostatic plasticity link activity-dependent changes in internal  
413 calcium concentrations to changes in channel mRNA and thus conductance densities<sup>23,</sup>  
414 <sup>34, 33</sup>. But changes in conductance need not rely on relatively slow changes in gene  
415 expression and subsequent translation. Here we considered how rapid changes to  
416 effective conductance density could also be activity-dependent and change the long-  
417 term excitability of a model neuron.

418 We propose two biologically plausible modifications to an existing homeostatic  
419 model<sup>30</sup> that allow for rapid, long-lasting adaptation to perturbation while preserving  
420 normal baseline activity. This model implements three sensors that monitor the calcium

July 1, 2021

421 current over different timescales. Specifically, each calcium sensor can be thought to  
422 represent a calcium-dependent process in the cell with different dynamics. For example,  
423 the three sensors could each represent a different calcium binding protein. In the  
424 original formulation of the model<sup>30</sup>, if any of the three sensors diverges from its set-  
425 point, conductance densities in the model neuron will change until the sensor returns to  
426 its calcium target. One modification we made is to assume that neuronal conductances  
427 cannot grow infinitely. Aside from obvious physical limitations on the number of ion  
428 channels that a neuron can contain, neurons may also limit their maximum conductance  
429 density to balance appropriate signaling with energy efficiency<sup>56, 57</sup>. This modification  
430 allows us to create model neurons with three calcium sensors whose target activity is  
431 stable over long periods of time<sup>23</sup>.

432         The most salient modification we made is to implement a gating mechanism that  
433 combines the readings of the three sensors to turn the homeostatic regulation of  
434 effective conductances on or off. Importantly, this new rule allows a model neuron to  
435 escape the requirement that all three sensors be satisfied and can turn off homeostatic  
436 regulation when target activity is “good enough”. This is in keeping with numerous  
437 studies demonstrating that many neuronal properties such as ion channel composition,  
438 synaptic weights and dendrite morphology can be sloppily tuned, and neurons can still  
439 function properly<sup>58-60</sup>. Biologically, the linking of the three calcium filters in the model  
440 could represent interactions between the different calcium binding processes within a  
441 cell. Given the vast complexity of calcium signaling processes, it would be unsurprising  
442 if multiple calcium binding processes were needed to initiate changes in effective  
443 channel conductance. Investigation into the specific signaling cascades or biological  
444 determinants of this adaptation are a topic for future experimental investigation.

July 1, 2021

445           Our results establish that using this feedback system, long-lasting adaptation to  
446 diverse perturbations and stimuli can be achieved in model neurons. Because the  
447 scheme does not require that neurons return to an exact equilibrium point, the model  
448 neurons can now retain a trace memory of past experiences even when they return to  
449 normal baseline activity. This sort of adaptation can result in degenerate circuits. For  
450 instance, models with identical starting conductances can acquire different neuronal  
451 properties despite maintaining similar activity patterns, depending on the perturbations  
452 each model is subject to. The gating scheme also opens the possibility of having more  
453 freedom in the way conductances are modified. Undoubtedly there will be rules that will  
454 be more efficient at recovering from specific perturbations, and this study provides a  
455 framework for activity-dependent models that can recover from any number of  
456 challenges, much like biological neurons. The ability to flexibly change the feedback  
457 rules would guarantee that if recovery is possible, it will happen if the neuron is kept in  
458 the perturbed condition for long enough.

459

#### 460 *High potassium perturbations in experiments and medicine*

461           The concentration of potassium both inside and outside cells is a critical  
462 component to proper physiological function. Despite this, few studies have focused on  
463 the acute and long-term effects of changing potassium levels. Our study highlights the  
464 possible consequences of even brief shocks of high potassium saline to a nervous  
465 system. Acute elevation of potassium concentrations is often used in experiments to  
466 rapidly excite or depolarize neurons as a proxy for excitatory inputs<sup>8-10</sup>. Here, we  
467 demonstrate that adaptation to elevated high potassium saline can occur rapidly, and  
468 significantly change the excitability and intrinsic properties of neurons within

July 1, 2021

469 minutes<sup>38</sup>. Therefore, studies using high potassium saline or other depolarizing stimuli  
470 should consider the possibility of rapid changes in neuronal excitability. Notably,  
471 adaptation acquired when neurons are stimulated with high potassium can be retained  
472 long after the perturbation has passed, even if baseline activity reverts and appears to be  
473 unchanged. Thus, long-term adaptation could have implications for a host of disease  
474 states involving repeated insults associated with high extracellular potassium. This  
475 phenomenon could be particularly important for understanding the long-term effects of  
476 epileptic seizures and kindling of localized seizures<sup>61</sup>. Within a seizure locus,  
477 extracellular potassium levels rapidly increase<sup>62, 63</sup>. Neurons experiencing this  
478 perturbation may change their conductance densities in response, and these changes  
479 may be maintained even after activity returns to normal levels. This sort of adaptation  
480 could exacerbate or ameliorate the severity of repeated seizures in the same locus.  
481 Similarly, these dynamics have been shown to affect peripheral nerves in patients with  
482 chronic kidney disease<sup>7</sup>.

483

#### 484 *Persistent, cryptic memory in neurons following perturbation*

485       Theoretical and experimental evidence shows that seemingly identical activity  
486 patterns in neurons can arise from widely variable underlying parameters<sup>33, 44, 49, 50, 53, 59,</sup>  
487 <sup>64-67</sup>. It has been observed that individual differences between human patients lead to  
488 different outcomes in cases of stroke<sup>68, 69</sup> and traumatic brain injury<sup>70, 71</sup>. Similarly, the  
489 pyloric rhythm of the STG responds stereotypically and robustly to many perturbations  
490 including temperature<sup>35, 72</sup> and pH<sup>36, 37</sup> within a permissive range; outside this universal  
491 permissive range, each individual circuit can be more or less robust to a given  
492 perturbation and is disrupted in a unique way<sup>42, 79, 44</sup>. The pyloric rhythm is also variable

July 1, 2021

493 in its response to high potassium saline<sup>38</sup> (Fig. 1C), and this variability likely arises from  
494 different initial conductance densities (Fig. 5). In all these cases, individual variability  
495 between circuits is invisible at baseline conditions and only revealed by a critical  
496 perturbation.

497         The origin of individual variability in neuronal circuits is a topic of ongoing  
498 exploration and debate<sup>53, 66, 73</sup>. Here we show that neurons can rapidly adapt to changes  
499 in the environment without maintaining precise levels of any given conductance. An  
500 interesting suggestion of this study is that circuits may evolve over time in response to  
501 environmental perturbations, while retaining their normal physiological function. Here,  
502 we show rapid adaptation to a high potassium perturbation in both biological and model  
503 neurons where the activity pattern returns to the baseline state after the perturbation is  
504 removed. We show that even though baseline neuronal activity appears unchanged, the  
505 robustness of neurons to future perturbation is altered. In this way, past exposure to  
506 high potassium saline acts as a prior, e.g. a past experience will bias the outcome of a  
507 future output<sup>74-76</sup>. Hence, adaptation in response to perturbation can be long-lasting and  
508 invisible when observing only baseline activity.

July 1, 2021

509

## 510 **Acknowledgments**

511 We thank Dr. Jonathan Touboul for useful discussions, and Janis Li for assistance  
512 running biological experiments. This work was supported by NIH R35 NS097343 (E.M.,  
513 L.A.) and F31-NS113383 (M.R.).

514

## 515 **Author Contributions**

516 M.R. and L.A. contributed equally to this work. M.R., L.A. and E.M. conceived the study  
517 design. M.R. performed biological experiments. L.A. performed the modeling  
518 experiments. All authors discussed the results and contributed to writing and editing the  
519 final manuscript and figures.

520

## 521 **Declaration of Interest**

522 The authors declare no conflicts of interest

523

## 524 **Data availability**

525 The data reported in this manuscript are available from the corresponding author upon  
526 reasonable request.

527

## 528 **Code availability**

529 The MATLAB analysis code and Python simulation code reported in this manuscript is  
530 available at the Marder lab GitHub (<https://github.com/marderlab>) upon publication.



July 1, 2021

## 531 **Work Cited**

- 532 1. Baylor, D.A. & Nicholls, J.G. Changes in extracellular potassium concentration produced  
533 by neuronal activity in the central nervous system of the leech. *J. Physiol.* **203**, 555-569 (1969).
- 534 2. Chauvette, S., Soltani, S., Seigneur, J. & Timofeev, I. *In vivo* models of cortical acquired  
535 epilepsy. *J. Neurosci. Methods* **260**, 185-201 (2016).
- 536 3. Katayama, Y., Becker, D.P., Tamura, T. & Hovda, D.A. Massive increases in extracellular  
537 potassium and the indiscriminate release of glutamate following concussive brain injury. *J.*  
538 *Neurosurg.* **73**, 889-900 (1990).
- 539 4. Rodgers, C.I., *et al.* Stress preconditioning of spreading depression in the locust CNS.  
540 *PLoS One* **2**, e1366 (2007).
- 541 5. Morrison III, B., Elkin, B.S., Dollé, J.-P. & Yarmush, M.L. *In vitro* models of traumatic brain  
542 injury. *Annu. Rev. Biomed. Eng.* **13**, 91-126 (2011).
- 543 6. Seeburg, D.P. & Sheng, M. Activity-induced Polo-like kinase 2 is required for  
544 homeostatic plasticity of hippocampal neurons during epileptiform activity. *J. Neurosci.* **28**,  
545 6583-6591 (2008).
- 546 7. Arnold, R., *et al.* Evidence for a causal relationship between hyperkalaemia and axonal  
547 dysfunction in end-stage kidney disease. *Clin. Neurophysiol.* **125**, 179-185 (2014).
- 548 8. Sharma, N., Gabel, Harrison W. & Greenberg, Michael E. A Shortcut to Activity-  
549 Dependent Transcription. *Cell* **161**, 1496-1498 (2015).
- 550 9. Rybak, I.A., Molkov, Y.I., Jasinski, P.E., Shevtsova, N.A. & Smith, J.C. Rhythmic Bursting in  
551 the Pre-Bötzing Complex. in *Prog. Brain Res.* 1-23 (Elsevier, 2014).
- 552 10. Ballerini, L., Galante, M., Grandolfo, M. & Nistri, A. Generation of rhythmic patterns of  
553 activity by ventral interneurons in rat organotypic spinal slice culture. *J. Physiol.* **517**, 459-475  
554 (1999).
- 555 11. Ruangkittisakul, A., Panaitescu, B. & Ballanyi, K. K<sup>+</sup> and Ca<sup>2+</sup> dependence of inspiratory-  
556 related rhythm in novel "calibrated" mouse brainstem slices. *Respir. Physiol. Neurobiol.* **175**, 37-  
557 48 (2011).
- 558 12. O'Leary, T., van Rossum, M.C. & Wyllie, D.J. Homeostasis of intrinsic excitability in  
559 hippocampal neurons: dynamics and mechanism of the response to chronic depolarization. *J.*  
560 *Physiol.* **588**, 157-170 (2010).
- 561 13. Grubb, M.S. & Burrone, J. Activity-dependent relocation of the axon initial segment fine-  
562 tunes neuronal excitability. *Nature* **465**, 1070-1074 (2010).
- 563 14. Rannals, M.D. & Kapur, J. Homeostatic strengthening of inhibitory synapses is mediated  
564 by the accumulation of GABAA receptors. *J. Neurosci.* **31**, 17701-17712 (2011).
- 565 15. Turrigiano, G. Homeostatic synaptic plasticity: local and global mechanisms for  
566 stabilizing neuronal function. *Cold Spring Harb. Perspect. Biol.* **4**, a005736 (2012).
- 567 16. Turrigiano, G.G., Leslie, K.R., Desai, N.S., Rutherford, L.C. & Nelson, S.B. Activity-  
568 dependent scaling of quantal amplitude in neocortical neurons. *Nature* **391**, 892-896 (1998).
- 569 17. Turrigiano, G.G. & Nelson, S.B. Homeostatic plasticity in the developing nervous system.  
570 *Nat. Rev. Neurosci.* **5**, 97-107 (2004).
- 571 18. Temporal, S., Lett, K.M. & Schulz, D.J. Activity-dependent feedback regulates correlated  
572 ion channel mRNA levels in single identified motor neurons. *Curr. Biol.* **24**, 1899-1904 (2014).

July 1, 2021

- 573 19. Brickley, S.G., Revilla, V., Cull-Candy, S.G., Wisden, W. & Farrant, M. Adaptive regulation  
574 of neuronal excitability by a voltage- independent potassium conductance. *Nature* **409**, 88-92  
575 (2001).
- 576 20. Golowasch, J., Abbott, L.F. & Marder, E. Activity-dependent regulation of potassium  
577 currents in an identified neuron of the stomatogastric ganglion of the crab *Cancer borealis*. *J.*  
578 *Neurosci.* **19**, RC33-RC33 (1999).
- 579 21. Desai, N.S. Homeostatic plasticity in the CNS: synaptic and intrinsic forms. *J. Physiol.*  
580 (*Paris*) **97**, 391-402 (2003).
- 581 22. Marder, E. & Goaillard, J.-M. Variability, compensation and homeostasis in neuron and  
582 network function. *Nat. Rev. Neurosci.* **7**, 563-574 (2006).
- 583 23. O'Leary, T., Williams, A.H., Franci, A. & Marder, E. Cell types, network homeostasis, and  
584 pathological compensation from a biologically plausible ion channel expression model. *Neuron*  
585 **82**, 809-821 (2014).
- 586 24. Mease, R.A., Famulare, M., Gjorgjieva, J., Moody, W.J. & Fairhall, A.L. Emergence of  
587 adaptive computation by single neurons in the developing cortex. *J. Neurosci.* **33**, 12154-12170  
588 (2013).
- 589 25. Hengen, K.B., Lambo, M.E., Van Hooser, S.D., Katz, D.B. & Turrigiano, G.G. Firing rate  
590 homeostasis in visual cortex of freely behaving rodents. *Neuron* **80**, 335-342 (2013).
- 591 26. Misonou, H., *et al.* Regulation of ion channel localization and phosphorylation by  
592 neuronal activity. *Nat. Neurosci.* **7**, 711-718 (2004).
- 593 27. Park, K.-S., Mohapatra, D.P., Misonou, H. & Trimmer, J.S. Graded regulation of the Kv2. 1  
594 potassium channel by variable phosphorylation. *Science* **313**, 976-979 (2006).
- 595 28. Capera, J., Serrano-Novillo, C., Navarro-Pérez, M., Cassinelli, S. & Felipe, A. The  
596 potassium channel odyssey: mechanisms of traffic and membrane arrangement. *Int. J. Mol. Sci.*  
597 **20**, 734 (2019).
- 598 29. Frank, C.A., Kennedy, M.J., Goold, C.P., Marek, K.W. & Davis, G.W. Mechanisms  
599 underlying the rapid induction and sustained expression of synaptic homeostasis. *Neuron* **52**,  
600 663-677 (2006).
- 601 30. Liu, Z., Golowasch, J., Marder, E. & Abbott, L. A model neuron with activity-dependent  
602 conductances regulated by multiple calcium sensors. *J. Neurosci.* **18**, 2309-2320 (1998).
- 603 31. Gorur-Shandilya, S., Marder, E. & O'Leary, T. Activity-dependent compensation of cell  
604 size is vulnerable to targeted deletion of ion channels. *Scientific Reports* **10** (2020).
- 605 32. Golowasch, J., Goldman, M.S., Abbott, L.F. & Marder, E. Failure of averaging in the  
606 construction of a conductance-based neuron model. *J. Neurophysiol.* **87**, 1129-1131 (2002).
- 607 33. O'Leary, T. & Marder, E. Temperature-Robust Neural Function from Activity-Dependent  
608 Ion Channel Regulation. *Curr. Biol.* **26**, 2935-2941 (2016).
- 609 34. LeMasson, G., Marder, E. & Abbott, L. Activity-dependent regulation of conductances in  
610 model neurons. *Science* **259**, 1915-1917 (1993).
- 611 35. Haddad, S.A. & Marder, E. Circuit robustness to temperature perturbation is altered by  
612 neuromodulators. *Neuron* **100**, 609-623 (2018).
- 613 36. Haley, J.A., Hampton, D. & Marder, E. Two central pattern generators from the crab,  
614 *Cancer borealis*, respond robustly and differentially to extreme extracellular pH. *eLife* **7**, e41877  
615 (2018).

July 1, 2021

- 616 37. Ratliff, J., Franci, A., Marder, E. & O'Leary, T. Neuronal oscillator robustness to multiple  
617 global perturbations. *Biophys. J.* (2021).
- 618 38. He, L.S., *et al.* Rapid adaptation to elevated extracellular potassium in the pyloric circuit  
619 of the crab, *Cancer borealis*. *J. Neurophysiol.* **123**, 2075-2089 (2020).
- 620 39. Harris-Warrick, R.M., Marder, E., Selverston, A.I. & Moulins, M. *Dynamic biological*  
621 *networks: the stomatogastric nervous system* (MIT press, 1992).
- 622 40. Soofi, W., *et al.* Phase maintenance in a rhythmic motor pattern during temperature  
623 changes *in vivo*. *J. Neurophysiol.* **111**, 2603-2613 (2014).
- 624 41. Morris, L.G. & Hooper, S.L. Muscle response to changing neuronal input in the lobster  
625 (*Panulirus interruptus*) stomatogastric system: spike number-versus spike frequency-dependent  
626 domains. *J. Neurosci.* **17**, 5956-5971 (1997).
- 627 42. Turrigiano, G., Abbott, L.F. & Eve, M. Activity-Dependent Changes in the Intrinsic  
628 Properties of Cultured Neurons. *Science, New Series* **264**, 974-977 (1994).
- 629 43. O'Leary, T. & Marder, E. Mapping Neural Activation onto Behavior in an Entire Animal.  
630 *Science* **344**, 372-373 (2014).
- 631 44. Schulz, D.J., Goillard, J.-M. & Marder, E. Variable channel expression in identified single  
632 and electrically coupled neurons in different animals. *Nat. Neurosci.* **9**, 356-362 (2006).
- 633 45. Goillard, J.-M., Taylor, A.L., Schulz, D.J. & Marder, E. Functional consequences of  
634 animal-to-animal variation in circuit parameters. *Nat. Neurosci.* **12**, 1424-1430 (2009).
- 635 46. Ransdell, J.L., Faust, T.B. & Schulz, D.J. Correlated Levels of mRNA and Soma Size in  
636 Single Identified Neurons: Evidence for Compartment-specific Regulation of Gene Expression.  
637 *Front. Mol. Neurosci.* **3**, 116 (2010).
- 638 47. Schulz, D.J., Goillard, J.M. & Marder, E.E. Quantitative expression profiling of identified  
639 neurons reveals cell-specific constraints on highly variable levels of gene expression. *Proc. Natl.*  
640 *Acad. Sci. U.S.A.* **104**, 13187-13191 (2007).
- 641 48. Tobin, A.E., Cruz-Bermudez, N.D., Marder, E. & Schulz, D.J. Correlations in ion channel  
642 mRNA in rhythmically active neurons. *PLoS One* **4**, e6742 (2009).
- 643 49. Prinz, A.A., Bucher, D. & Marder, E. Similar network activity from disparate circuit  
644 parameters. *Nat. Neurosci.* **7**, 1345-1352 (2004).
- 645 50. Alonso, L.M. & Marder, E. Visualization of currents in neural models with similar  
646 behavior and different conductance densities. *eLife* **8**, e42722 (2019).
- 647 51. Turrigiano, G. Homeostatic synaptic plasticity: local and global mechanisms for  
648 stabilizing neuronal function. *Cold Spring Harb. Perspect. Biol.* **4**, a005736 (2012).
- 649 52. Desai, N.S., Rutherford, L.C. & Turrigiano, G.G. Plasticity in the intrinsic excitability of  
650 cortical pyramidal neurons. *Nat. Neurosci.* **2**, 515-520 (1999).
- 651 53. Lane, B.J., Samarth, P., Ransdell, J.L., Nair, S.S. & Schulz, D.J. Synergistic plasticity of  
652 intrinsic conductance and electrical coupling restores synchrony in an intact motor network.  
653 *eLife* **5**, e16879 (2016).
- 654 54. Roach, J.P., Sander, L.M. & Zochowski, M.R. Memory recall and spike-frequency  
655 adaptation. *Phys. Rev.* **93**, 052307 (2016).
- 656 55. Benda, J., Longtin, A. & Maler, L. Spike-frequency adaptation separates transient  
657 communication signals from background oscillations. *J. Neurosci.* **25**, 2312-2321 (2005).

July 1, 2021

- 658 56. Sengupta, B., Faisal, A.A., Laughlin, S.B. & Niven, J.E. The effect of cell size and channel  
659 density on neuronal information encoding and energy efficiency. *J. Cereb. Blood Flow Metab.*  
660 **33**, 1465-1473 (2013).
- 661 57. Kim, M., McKinnon, D., MacCarthy, T., Rosati, B. & McKinnon, D. Regulatory evolution  
662 and voltage-gated ion channel expression in squid axon: selection-mutation balance and fitness  
663 cliffs. *PLoS One* **10**, e0120785 (2015).
- 664 58. Otopalik, A.G., Sutton, A.C., Banghart, M. & Marder, E. When complex neuronal  
665 structures may not matter. *eLife* **6** (2017).
- 666 59. Sakurai, A., Tamvacakis, A.N. & Katz, P.S. Hidden synaptic differences in a neural circuit  
667 underlie differential behavioral susceptibility to a neural injury. *eLife* **3**, e02598 (2014).
- 668 60. Marder, E., Goeritz, M.L. & Otopalik, A.G. Robust circuit rhythms in small circuits arise  
669 from variable circuit components and mechanisms. *Curr. Opin. Neurobiol.* **31**, 156-163 (2015).
- 670 61. Chauvette, S., Soltani, S., Seigneur, J. & Timofeev, I. In vivo models of cortical acquired  
671 epilepsy. *J. Neurosci. Methods* **260**, 185-201 (2016).
- 672 62. Moody, W.J., Jr., Futamachi, K.J. & Prince, D.A. Extracellular potassium activity during  
673 epileptogenesis. *Exp. Neurol.* **42**, 248-263 (1974).
- 674 63. Fröhlich, F., Bazhenov, M., Iragui-Madoz, V. & Sejnowski, T.J. Potassium dynamics in the  
675 epileptic cortex: new insights on an old topic. *Neuroscientist* **14**, 422-433 (2008).
- 676 64. Klassen, T., *et al.* Exome sequencing of ion channel genes reveals complex profiles  
677 confounding personal risk assessment in epilepsy. *Cell* **145**, 1036-1048 (2011).
- 678 65. Fuzik, J., *et al.* Integration of electrophysiological recordings with single-cell RNA-seq  
679 data identifies neuronal subtypes. *Nat. Biotechnol.* **34**, 175 (2016).
- 680 66. Ciarleglio, C.M., *et al.* Correction: Multivariate analysis of electrophysiological diversity  
681 of *Xenopus* visual neurons during development and plasticity. *eLife* **5**, e14282 (2016).
- 682 67. Goldman, M.S., Golowasch, J., Marder, E. & Abbott, L. Global structure, robustness, and  
683 modulation of neuronal models. *J. Neurosci.* **21**, 5229-5238 (2001).
- 684 68. Price, C.J., Seghier, M.L. & Leff, A.P. Predicting language outcome and recovery after  
685 stroke: the PLORAS system. *Nat. Rev. Neurol.* **6**, 202-210 (2010).
- 686 69. Cramer, S.C. Repairing the human brain after stroke: I. Mechanisms of spontaneous  
687 recovery. *Ann. Neurol.* **63**, 272-287 (2008).
- 688 70. Juengst, S.B., Terhorst, L., Kew, C.L. & Wagner, A.K. Variability in daily self-reported  
689 emotional symptoms and fatigue measured over eight weeks in community dwelling individuals  
690 with traumatic brain injury. *Brain injury* **33**, 567-573 (2019).
- 691 71. Dams-O'Connor, K., *et al.* Rehospitalization over 10 years among survivors of TBI: A  
692 National Institute on Disability, Independent Living and Rehabilitation Research (NIDILRR)  
693 Traumatic Brain Injury Model Systems Study. *J. Head Trauma Rehabil.* **32**, 147 (2017).
- 694 72. Tang, L.S., Taylor, A.L., Rinberg, A. & Marder, E. Robustness of a rhythmic circuit to  
695 short-and long-term temperature changes. *J. Neurosci.* **32**, 10075-10085 (2012).
- 696 73. Nelson, S.B. & Turrigiano, G.G. Strength through diversity. *Neuron* **60**, 477-482 (2008).
- 697 74. Verstynen, T. & Sabes, P.N. How each movement changes the next: an experimental and  
698 theoretical study of fast adaptive priors in reaching. *J. Neurosci.* **31**, 10050-10059 (2011).
- 699 75. Yang, J., Lee, J. & Lisberger, S.G. The interaction of Bayesian priors and sensory data and  
700 its neural circuit implementation in visually guided movement. *J. Neurosci.* **32**, 17632-17645  
701 (2012).

July 1, 2021

702 76. Darlington, T.R., Tokiyama, S. & Lisberger, S.G. Control of the strength of visual-motor  
703 transmission as the mechanism of rapid adaptation of priors for Bayesian inference in smooth  
704 pursuit eye movements. *J. Neurophysiol.* **118**, 1173-1189 (2017).  
705

July 1, 2021

706 **Figure Legends**

707 **Figure 1: PD neurons adapt to elevated potassium concentrations and are**  
708 **more robust to the perturbation upon repeated exposure.**

709 **(a)** Two-second segments of a PD neuron's activity in control physiological saline (*i*),  
710 five (*ii*), ten (*iii*), fifteen (*iv*) and twenty (*v*) minutes into the first application of  $2.5x[K^+]$   
711 saline and during the first wash period (*vi*). Below each trace is shown the spike raster  
712 with a vertical line plotted for every action potential in the trace. **(b)** Voltage trace for  
713 the same PD neuron over the entire experiment. Green shaded boxes indicate time of  
714  $2.5x[K^+]$  saline superperfusion. Below this trace is shown is a raster plot of spiking  
715 activity for the entire first application of  $2.5x[K^+]$  saline, with bursting activity plotted in  
716 a darker shade and tonic firing plotted in a lighter shade. **(c)** Raster plots of spiking  
717 activity in  $2.5x[K^+]$  saline for fourteen PD neurons exposed to three repeated exposures.  
718 For all plots, bursting activity is plotted in a darker shade and tonic firing in a lighter  
719 shade. **(d)** Average PD spikes per minute for all three applications are plotted in the  
720 dark line with SEM shaded regions around them. **(e)** Average PD dip value for all three  
721 applications are plotted in the dark line with SEM shaded regions around them.

722

723 **Figure 2: Bursting activity of PD neurons in control saline is unchanged**  
724 **after high potassium applications.**

725 **(a)** Three-second segments of three PD neurons' activity in baseline, wash #1, wash #2,  
726 and wash #3 after high potassium applications. All traces are in control saline with  
727 normal physiological potassium concentration. The animal numbers on the left  
728 correspond to the animal numbers in Figure 1C. **(b)** Average burst frequency in each  
729 condition for all PD neurons with error bars representing standard deviation. Individual

July 1, 2021

730 experiments are connected with light grey lines. The mean of all PD burst frequencies  
731 for each time point is indicated by a thick red line. **(c)** Average spikes per burst in each  
732 condition for all PD neurons; error bars represent standard deviation. Individual  
733 experiments are connected with light grey lines. The mean of all PD spikes per burst for  
734 each time point is indicated by a thick red line.

735

736 **Figure 3: PD neurons retain adaptation to high potassium saline even after**  
737 **several hours of wash in control saline.**

738 **(a)** Four-second segments of a PD neuron's activity in control physiological saline (*i*),  
739 and at fifteen minutes into the first (*ii*), second (*iii*), third (*iv*), and fourth (*v*)  
740 applications of 2.5x[K<sup>+</sup>] saline, and upon the final wash in control saline (*vi*). **(b)**  
741 Voltage trace for the same PD neuron over the entire experiment. Green shaded boxes  
742 indicate time of 2.5x[K<sup>+</sup>] saline superfusion. Below this trace is shown is a raster plot  
743 of spiking activity for each of the four applications of 2.5x[K<sup>+</sup>] saline, with bursting  
744 activity plotted in a darker shade and tonic firing plotted in a lighter shade. **(c)** Raster  
745 plots of spiking activity in 2.5x[K<sup>+</sup>] saline for six PD neurons (15-20) exposed to the  
746 same four repeated exposures. For all plots, bursting activity is plotted in a darker shade  
747 and tonic firing in a lighter shade. The top raster (15) is the same animal as that shown  
748 in **a** and **b** above **(d)** Average PD spikes per minute for all four applications are plotted  
749 in the dark line with SEM shaded regions around them **(e)** Average PD dip value for all  
750 three applications are plotted in the dark line with SEM shaded regions around the  
751 lines.

752

July 1, 2021

753 **Figure 4: Model bursting neuron response to high potassium.** The top panels  
754 show representative voltage traces (*i-iv*) for all models (**a-c**) and green bars above the  
755 voltage trace represent the high potassium perturbation. The compressed voltage trace  
756 of the model neuron is shown in the top panel and the evolution of that model's  
757 conductance densities are shown below (**a**) The model does not have a regulation  
758 mechanism, and the conductances are fixed. The model becomes quiescent in the high  
759 potassium condition regardless of its history. (**b**) The model regulates its conductances  
760 in an activity dependent manner to stabilize the control bursting pattern. The model  
761 becomes quiescent in high potassium but recovers spiking over ten minutes. During the  
762 long wash, conductances return to the control values, and history dependence is  
763 erased. (**c**) The model is identical to **b**, with an additional feedback signal ( $S_f$ ) that  
764 monitors if the cell is bursting or not. The model regulates its conductances only if  
765 the feedback signal is low. The conductances stay constant during the long wash because  
766 the cell is bursting, and the feedback signal turns off the regulation mechanism.

767

768 **Figure 5: Time course of recovery depends on starting conductance**  
769 **densities.** Response of five model bursting neurons (models P, Q, R, S and T) with  
770 different conductance densities exposed to a high potassium perturbation, represented  
771 by the green bars. (**a**) Representative traces of five models in control (*i*) and in elevated  
772 extracellular K (*ii*). (**b**) Membrane potential trace over the high potassium perturbation.  
773 All models become quiescent upon perturbation and recover spiking over a variable  
774 amount of time. (**c**) Conductance densities for each model over time.

775

776



July 1, 2021

777 **Figure 6. Models with different starting conductance densities retain**  
778 **robustness to high potassium saline, but specific changes in currents and**  
779 **recovery patterns vary.** The green bars above the voltage traces represent the time  
780 of high potassium perturbation **(a)** The response of model Q to the entire high  
781 potassium experiment. **(b)** The response of model T to the entire high potassium  
782 experiment. Timepoints of interest are consistent between models- baseline (*i*), 10  
783 minutes in first high potassium application (*ii*), 10 minutes in the fourth high potassium  
784 application (*iii*) and final wash (*iv*). **Top panels:** Membrane potential over  
785 time. **Bottom panels:** Currentscapes (*i-iv*). The colored panels show the percentage  
786 contribution of each individual current to the total inward or outward current over  
787 time. The black filled curves on the top and bottom indicate total inward or outward  
788 currents respectively on a logarithmic scale.

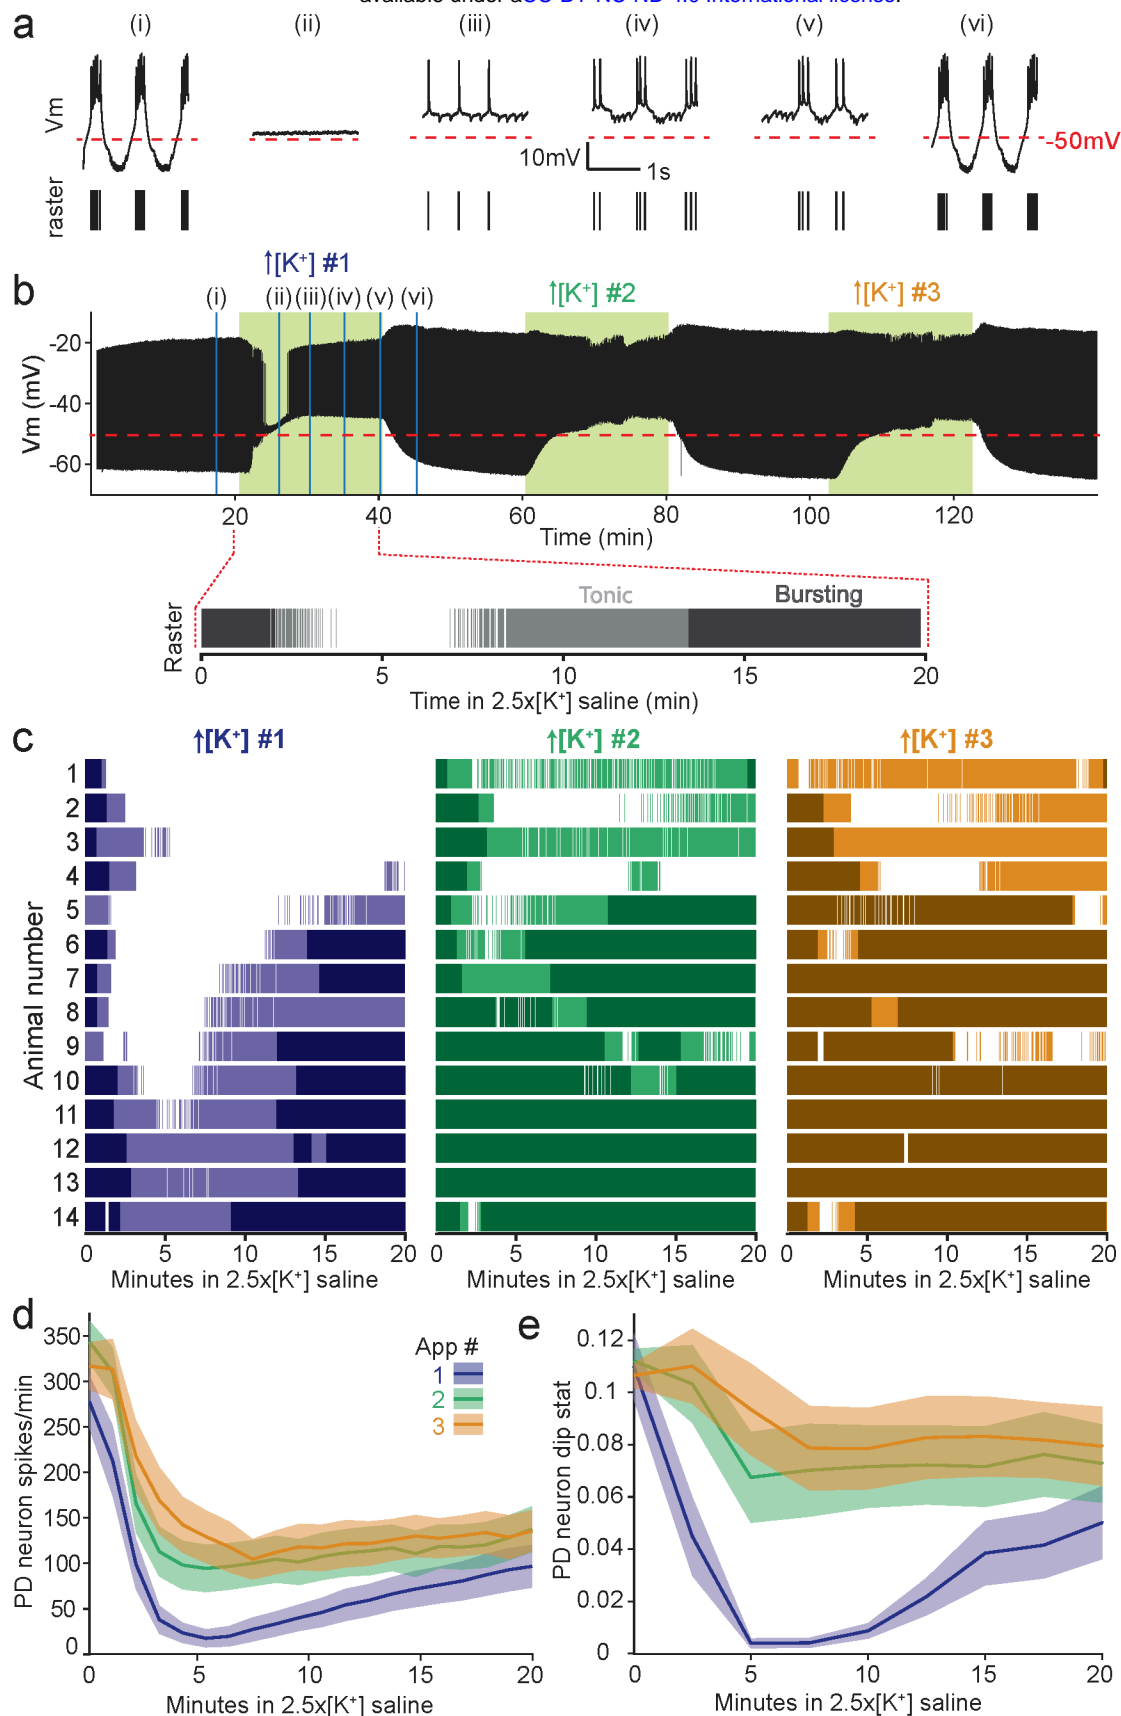

**Figure 1: PD neurons adapt to elevated potassium concentrations and are more robust to the perturbation upon repeated exposure.** (a) Two-second segments of a PD neuron's activity in control physiological saline (i), five (ii), ten (iii), fifteen (iv) and twenty (v) minutes into the first application of 2.5x[K<sup>+</sup>] saline and during the first wash period (vi). Below each trace is shown the spike raster with a vertical line plotted for every action potential in the trace. (b) Voltage trace for the same PD neuron over the entire experiment. Green shaded boxes indicate time of 2.5x[K<sup>+</sup>] saline superfusion. Below this trace is shown is a raster plot of spiking activity for the entire first application of 2.5x[K<sup>+</sup>] saline, with bursting activity plotted in a darker shade and tonic firing plotted in a lighter shade. (c) Raster plots of spiking activity in 2.5x[K<sup>+</sup>] saline for fourteen PD neurons exposed to three repeated exposures. For all plots, bursting activity is plotted in a darker shade and tonic firing in a lighter shade. (d) Average PD neuron spikes per minute for all three applications are plotted in the dark line with SEM shaded regions around them. (e) Average PD neuron dip value for all three applications are plotted in the dark line with SEM shaded regions around them.

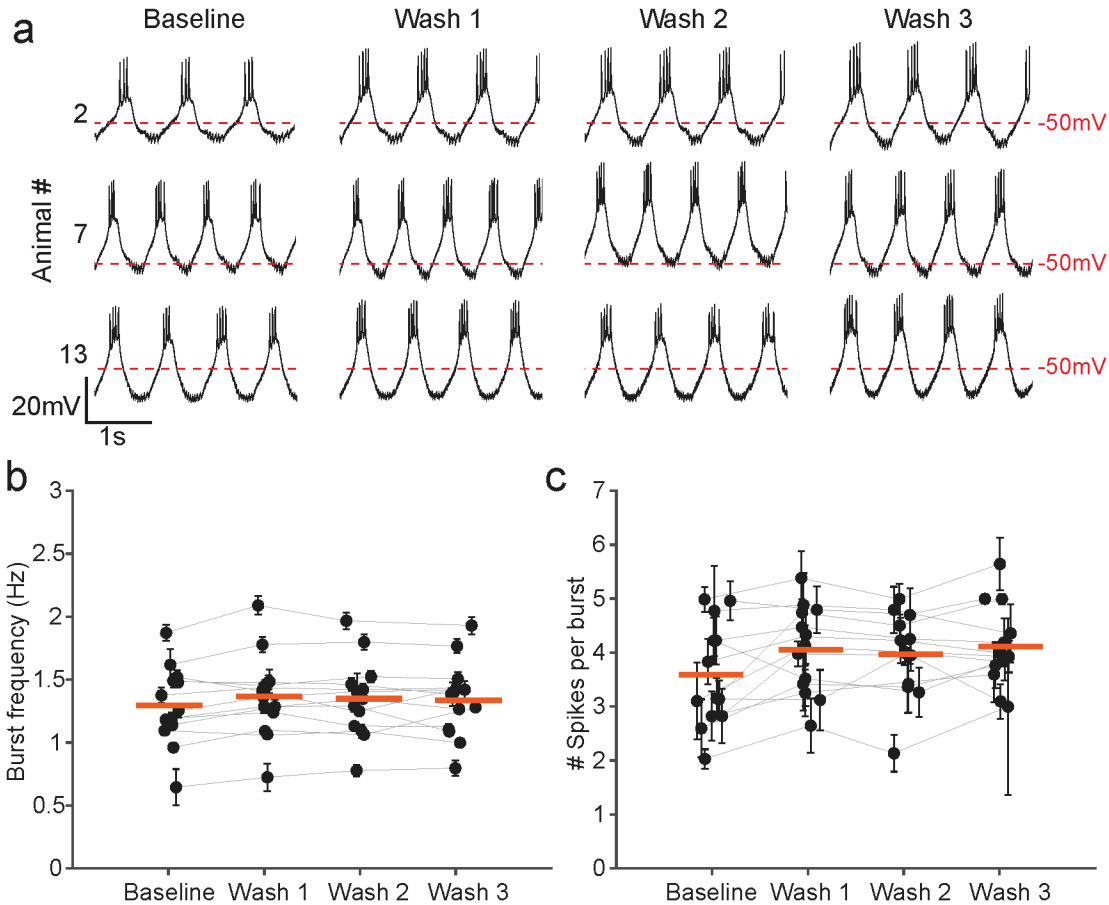

**Figure 2: Bursting activity of PD neurons in control saline is unchanged after high potassium application.**

**(a)** Three-second segments of three PD neurons' activity in baseline, wash #1, wash #2, and wash #3 after high potassium applications. All traces are in control saline with normal physiological potassium concentration. The animal numbers on the left correspond to the animal numbers in Figure 1c. **(b)** Average burst frequency in each condition for all PD neurons with error bars representing standard deviation. Individual experiments are connected with light grey lines. The mean of all PD burst frequencies for each time point is indicated by a thick red line. **(c)** Average spikes per burst in each condition for all PD neurons; error bars represent standard deviation. Individual experiments are connected with light grey lines. The mean of all PD spikes per burst for each time point is indicated by a thick red line.

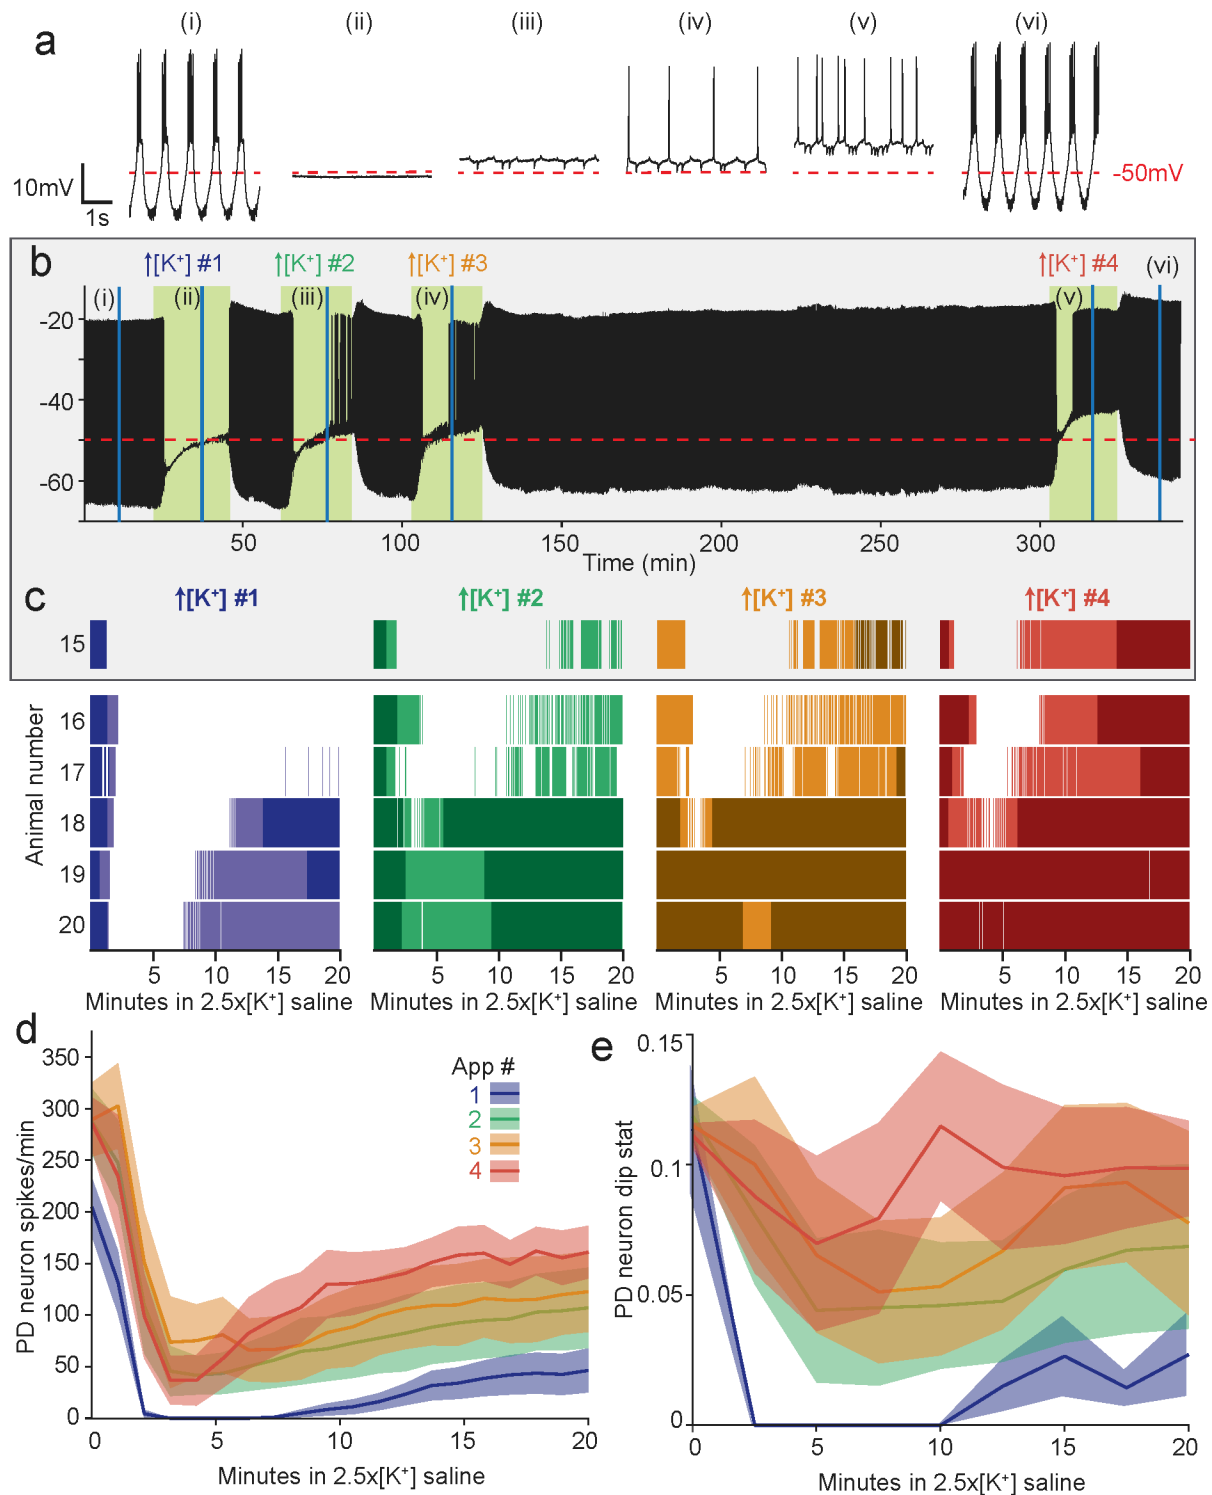

**Figure 3: PD neurons retain adaptation to high potassium saline even after several hours of wash in control saline.** **(a)** Four-second segments of a PD neuron's activity in control physiological saline (i), and at fifteen minutes into the first (ii), second (iii), third (iv), and fourth (v) applications of 2.5x[K<sup>+</sup>] saline, and upon the final wash in control saline (vi). **(b)** Voltage trace for the same PD neuron over the entire experiment. Green shaded boxes indicate time of 2.5x[K<sup>+</sup>] saline superfusion. Below this trace is shown is a raster plot of spiking activity for each of the four applications of 2.5x[K<sup>+</sup>] saline, with bursting activity plotted in a darker shade and tonic firing plotted in a lighter shade. **(c)** Raster plots of spiking activity in 2.5x[K<sup>+</sup>] saline for six PD neurons (15-20) exposed to the same four repeated exposures. For all plots, bursting activity is plotted in a darker shade and tonic firing in a lighter shade. The top raster (15) animal is the same as that shown in **a** and **b** above. **(d)** Average PD spikes per minute for all four applications are plotted in the dark line with SEM shaded regions around them. **(e)** Average PD dip value for all three applications are plotted in the dark line with SEM shaded regions around the lines.

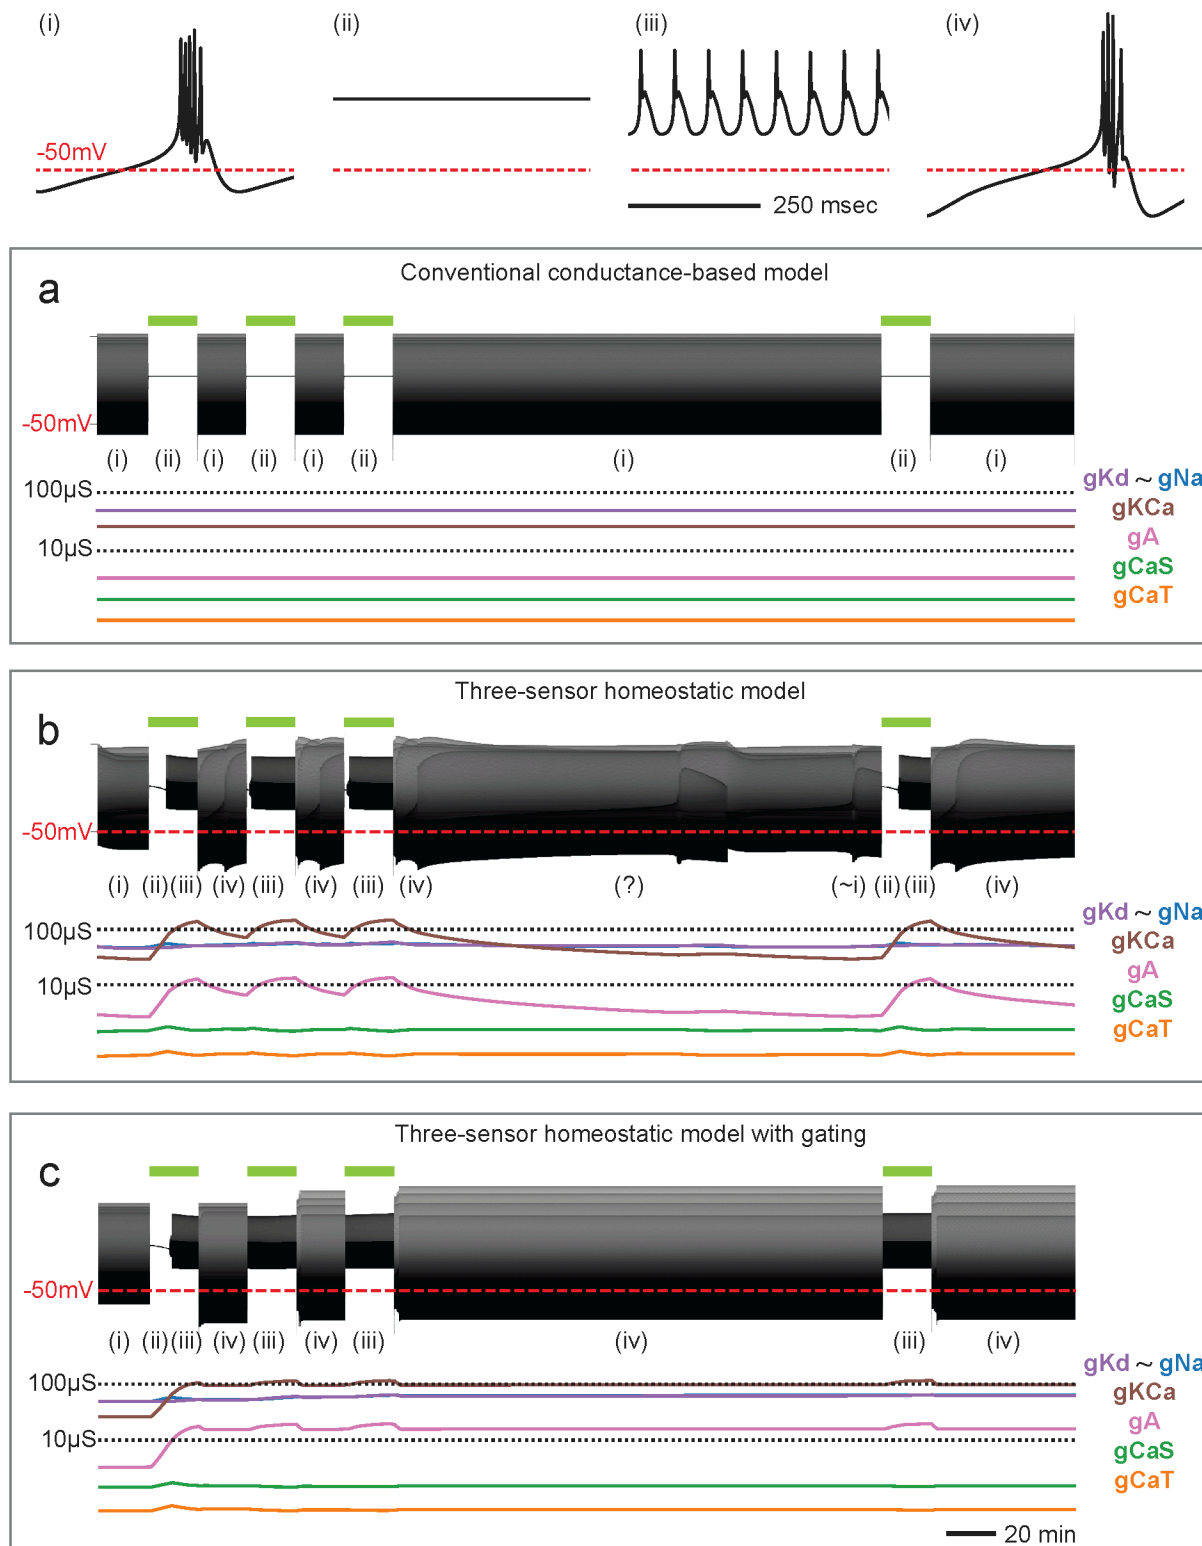

**Figure 4: Modeling bursting neurons' adaptation to high potassium.** The top panels show representative voltage traces (i-iv) for all models (a-c) and green bars above the voltage trace represent the high potassium perturbation. The compressed voltage trace of the model neuron is shown in the top panel and the evolution of that model's conductance densities are shown below (a) The model does not have a regulation mechanism, and the conductances are fixed. The model becomes quiescent in the high potassium condition regardless of its history. (b) The model regulates its conductances in an activity dependent manner to stabilize the control bursting pattern. The model becomes quiescent in high potassium but recovers spiking over ten minutes. During the long wash, conductances return to the control values, and history dependence is erased. (c) The model is identical to b with an additional feedback signal (Sf) that monitors if the cell is bursting or not. The model regulates its conductances only if the feedback signal is low. The conductances stay constant during the long wash because the cell is bursting, and the feedback signal turns off the regulation mechanism.

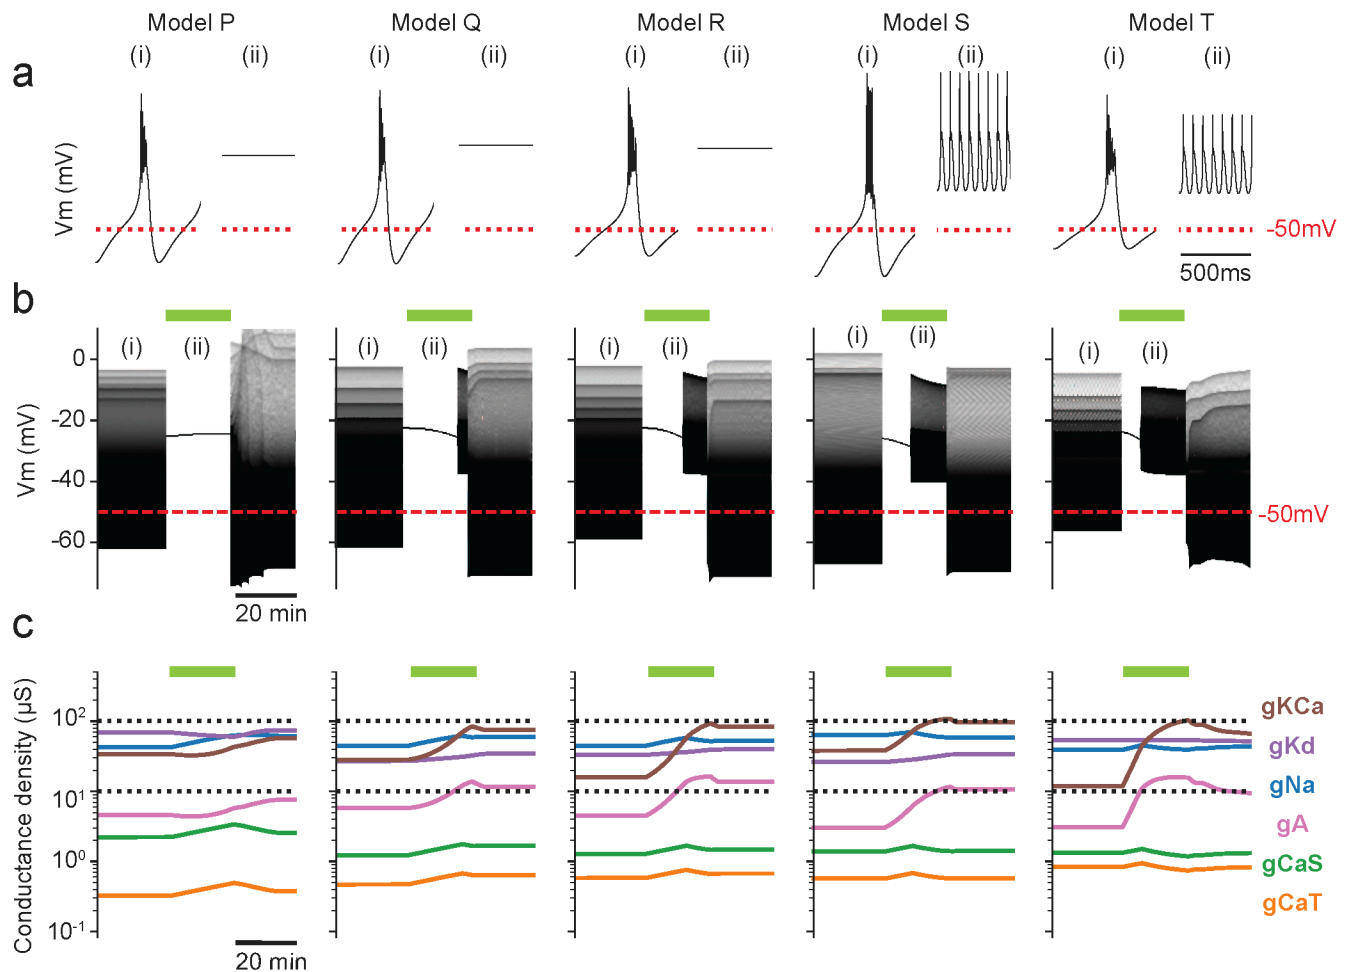

**Figure 5: Time course of recovery depends on starting conductance densities.** Response of five model bursting neurons (models P, Q, R, S and T) with different conductance densities exposed to a high potassium perturbation, represented by the green bars. **(a)** Representative traces of five models in control (i) and in elevated extracellular K (ii). **(b)** Membrane potential trace over the high potassium perturbation. All models become quiescent upon perturbation and recover spiking over a variable amount of time. **(c)** Conductance densities for each model over time.

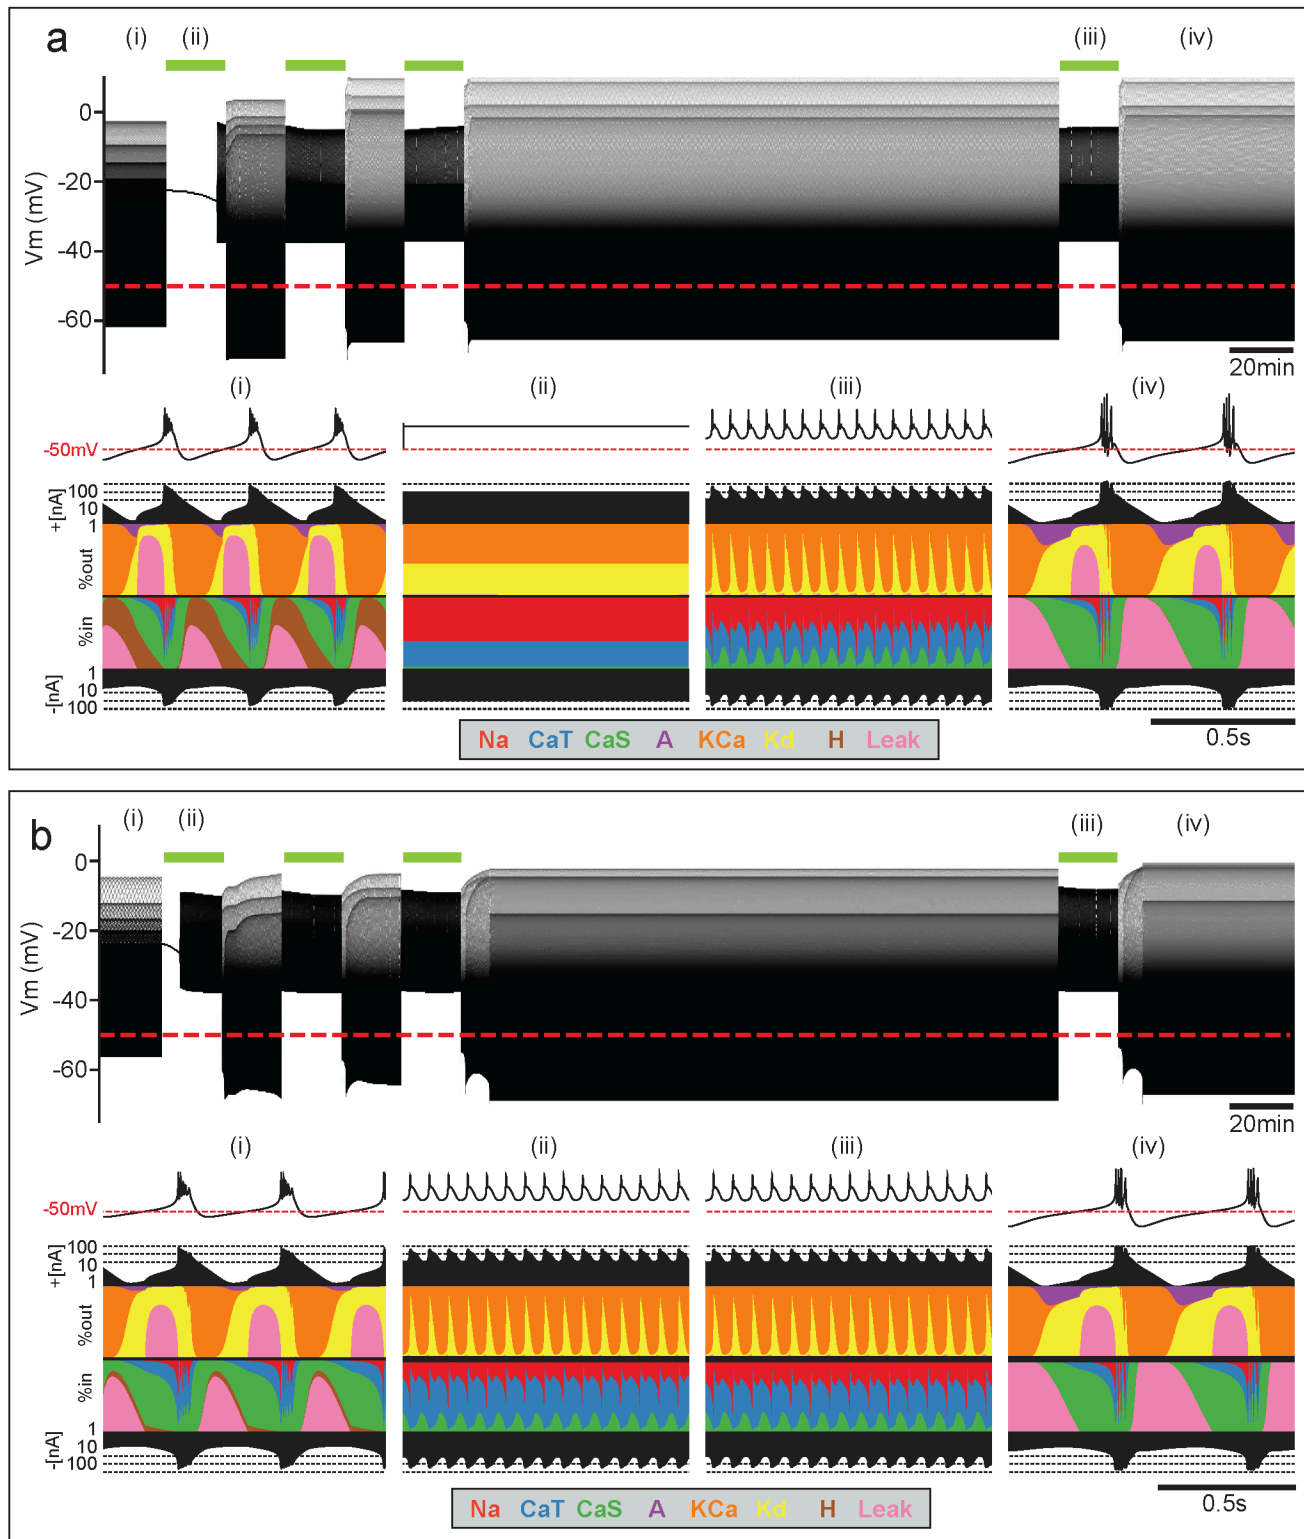

**Figure 6. Models with different starting conductance densities retain robustness to high potassium saline, but specific changes in currents and recovery patterns vary.** The green bars above the voltage traces represent the time of high potassium perturbation **(a)** The response of model Q to the entire high potassium experiment. **(b)** The response of model T to the entire high potassium experiment. Timepoints of interest are consistent between models- baseline (i), 10 minutes in first high potassium application (ii), 10 minutes in the fourth high potassium application (iii) and final wash (iv). Top panels: Membrane potential over time. Bottom panels: Currentscapes (i-iv). The colored panels show the percentage contribution of each individual current to the total inward or outward current over time. The black filled curves on the top and bottom indicate total inward or outward currents respectively on a logarithmic scale.

## 1 **Methods**

### 2 **Animals and dissections**

3 Adult male Jonah Crabs, *Cancer borealis*, (N = 20) were obtained from Commercial  
4 Lobster (Boston, MA) from January to August 2020 and maintained in artificial  
5 seawater at 10-12 °C in a 12-hour light/dark cycle. On average, animals were acclimated  
6 in the laboratory for one week before use. Prior to dissection, animals were placed on ice  
7 for at least 30 minutes. Dissections were performed as previously described<sup>1</sup>. The  
8 stomach was dissected from the animal and the intact stomatogastric nervous system  
9 (STNS) was removed from the stomach including the commissural ganglia, esophageal  
10 ganglion and stomatogastric ganglion (STG) with connecting motor nerves. The STNS  
11 was pinned in a Sylgard-coated (Dow Corning) dish and continuously superfused with  
12 11 °C saline.

13

### 14 **Solutions**

15 Physiological (control) *Cancer borealis* saline was composed of 440 mM NaCl, 11  
16 mM KCl, 26 mM MgCl<sub>2</sub>, 13 mM CaCl<sub>2</sub>, 11 mM Trizma base, 5 mM maleic acid, pH 7.4-  
17 7.5 at 23 °C (approximately 7.7-7.8 pH at 11 °C). High [K<sup>+</sup>] saline (2.5x[K<sup>+</sup>],  
18 27.5mM KCl) was prepared by adding more KCl salt to the normal saline.

19

### 20 **Electrophysiology**

21 Intracellular recordings from STG somata were made in the desheathed STG with 10–30  
22 MΩ sharp glass microelectrodes filled with internal solution: 10 mM MgCl<sub>2</sub>, 400 mM  
23 potassium gluconate, 10 mM HEPES buffer, 15 mM NaSO<sub>4</sub>, 20 mM NaCl<sup>2</sup>. Intracellular  
24 signals were amplified with an Axoclamp 900A amplifier (Molecular Devices, San Jose).



25 Extracellular nerve recordings were made by building wells around nerves using a  
26 mixture of Vaseline and mineral oil and placing stainless-steel pin electrodes within the  
27 wells to monitor spiking activity. Extracellular nerve recordings were amplified using  
28 model 3500 extracellular amplifiers (A-M Systems). Data were acquired using  
29 a Digidata 1440 digitizer (Molecular Devices, San Jose) and pClamp data acquisition  
30 software (Molecular Devices, San Jose, version 10.5). For identification of Pyloric  
31 Dilator (PD) neurons, somatic intracellular recordings were matched to extracellular  
32 action potentials on the pyloric dilator nerve (*pdn*) and/or the lateral ventricular nerve  
33 (*lvn*).

34

### 35 **Elevated [K<sup>+</sup>] saline application**

36 For all preparations, baseline activity of the PD neuron was first recorded for 30  
37 minutes in control saline. Following the baseline recording, the STNS  
38 was superfused with 2.5x[K<sup>+</sup>] saline for 20 minutes, followed by a 20-minute wash in  
39 control saline. This pattern was repeated, alternating between 20 minute 2.5x[K<sup>+</sup>] saline  
40 and physiological control saline three times. In some experiments, the preparation was  
41 then washed in physiological saline for three hours before a final fourth 20-minute  
42 2.5x[K<sup>+</sup>] saline application and a final 20-minute wash.

43

### 44 **Data acquisition and analysis**

45 Recordings were acquired using Clampex software (pClamp Suite by Molecular Devices,  
46 San Jose, version 10.5) and visualized and analyzed using custom MATLAB analysis  
47 scripts. These scripts were used to detect and measure voltage response amplitudes and

48 membrane potentials, plot raw recordings and processed data, generate raster plots, and  
49 perform some statistical analyses.

50

### 51 **Analysis of interspike interval distributions**

52 To extract spike times, we used a custom spike identification and sorting software  
53 (called “crabsort”) which uses a TensorFlow based machine-learning algorithm.

54 Crabsort is freely available at <https://github.com/sg-s/crabsort> and its use is described

55 in Powell et al. (2021)<sup>3</sup>. Distributions of inter-spike intervals (ISIs) were calculated

56 within 2-minute bins. Hartigan’s dip test of unimodality<sup>4</sup> was used to obtain the dip

57 statistic for each of these distributions. This dip statistic was compared to Table 1

58 in Hartigan and Hartigan<sup>4</sup> to find the probability of multi-modality. The test creates a

59 unimodal distribution function that has the smallest value deviations from the

60 experimental distribution function. The largest of these deviations is the dip statistic.

61 The dip statistic shows the probability of the experimental distribution function being

62 bimodal. Larger value dips indicate that the empirical data are more likely to have

63 multiple modes<sup>4</sup>. For visualizing spiking activity in raster plots, if the dip statistic was

64 0.05 or higher the neuron was considered to be bursting. If the dip statistic was lower

65 than 0.05 the neuron was considered to be tonically firing. In neurons with less than 30

66 action potentials per minute, there were too few spikes to calculate an accurate dip

67 statistic and the neurons are labeled as tonically firing.

68

### 69 **Computational modeling of bursting neurons**

70 In this work we implemented modifications of the model by Liu et al. (1998). The model

71 neuron has a sodium current,  $I_{Na}$ ; transient and slow calcium currents  $I_{CaT}$  and  $I_{CaS}$ ; a

72 transient potassium current,  $I_A$ ; a calcium dependent potassium current,  $I_{KCa}$ ; a delayed  
 73 rectifier potassium current,  $I_{Kd}$ ; a hyperpolarization-activated inward current,  $I_H$ ; and a  
 74 leak current  $I_{Leak}$ . The model uses its calcium currents to modify its conductance  
 75 densities to achieve a target activity. The model has three sensors that monitor the  
 76 calcium currents over different time scales and are named accordingly as fast (F), slow  
 77 (S) and dc (D). The activity of these sensors are used to drive changes in the maximal  
 78 conductances using the following equation,

$$79 \quad \tau_g \frac{dg_i}{dt} = [A_i(\bar{F} - F) + B_i(\bar{S} - S) + C_i(\bar{D} - D)]g_i. \quad (4)$$

80 Here  $\bar{F}$ ,  $\bar{S}$  and  $\bar{C}$  are *target values* for the average activity of the sensors and  $\tau_g$  is the  
 81 time scale of conductance evolution and index  $i$  specifies the current type. The  
 82 coefficients  $A_i$ ,  $B_i$  and  $C_i$  determine what the model will do with each conductance when  
 83 the average activity of the corresponding sensor is off-target. Hereafter, we refer to these  
 84 coefficients as the “control scheme” or “scheme”. The scheme used by Liu et al. (1998) is  
 85 reproduced in [table IIIA](#).

|   | Na | CaS | CaT | Kd | KCa | A  | H |
|---|----|-----|-----|----|-----|----|---|
| A | 1  | 0   | 0   | 1  | 0   | 0  | 0 |
| B | 0  | 1   | 1   | -1 | -1  | -1 | 1 |
| C | 0  | 0   | 0   | 0  | -1  | -1 | 1 |

TABLE I. Control scheme used in ([Liu et al., 1998](#))

86  
 87 We can rewrite the equations in vector notation by introducing the maximal  
 88 conductance vector  $\mathbf{g} = \{g_i\}$  with  $g_i$  the maximal conductance of channel type  $i$  and  
 89 error vector  $\boldsymbol{\delta}$  as follows,

$$90 \quad \boldsymbol{\delta} = [(\bar{F} - F), (\bar{S} - S), (\bar{D} - D)] \quad (5)$$

$$91 \quad \tau_g \dot{\mathbf{g}} = \mathbf{A}\boldsymbol{\delta}\mathbf{g}.$$

92 In this notation the control scheme in table IIIA is represented by a matrix  $\mathbf{A}$  and the  
 93 distance between each sensor and its target is represented by vector  $\boldsymbol{\delta}(t)$ .

94 We added a cubic term in each component of  $\dot{\mathbf{g}}$  to prevent the model's  
 95 conductances from growing exponentially large. We found that there is a range of values  
 96 of  $\gamma$  for which the model neuron always settles into a periodic bursting regime. For  
 97 Figure 4b we used  $\gamma_i = 10^5$  for all currents except  $I_A$  where we used  $\gamma_A = 60 \times 10^{-5}$

$$98 \quad \tau_g \dot{\mathbf{g}} = \mathbf{A}\boldsymbol{\delta}\mathbf{g} - \gamma\mathbf{g}^3. \quad (6)$$

99 To modulate the timescale of conductance change,  $\tau_g$ , we defined a feedback signal  $S_f$  as  
 100 follows,

$$101 \quad S_f(t) = e^{\frac{-(\langle \bar{F} - F \rangle)^2}{\Delta}} \times e^{\frac{-(\langle \bar{S} - S \rangle)^2}{\Delta}} \times e^{\frac{-(\langle \bar{D} - D \rangle)^2}{\Delta}}. \quad (7)$$

102  
 103 This quantity is the product of three gaussian functions that will take values close to 1 if  
 104 the corresponding sensor is near its set point and values close to 0 otherwise. By  
 105 definition,  $S_f$  takes values close to 1 if all three sensors are near their targets at the same  
 106 time, and close to 0 otherwise. Parameter  $\Delta$  determines how close the sensors need to be  
 107 to their set points to produce a high feedback. In this work we set  $\Delta = 0.001$ .

108 The timescale for evolution of conductance densities is modulated by a state  
 109 variable  $\alpha$  as follows,

$$110 \quad \tau_g \dot{\mathbf{g}} = \{\mathbf{A}\boldsymbol{\delta}\mathbf{g} - \gamma\mathbf{g}^3\} \alpha$$

$$111 \quad \tau_\alpha \dot{\alpha} = \alpha_\infty(S_f) - \alpha, \quad (8)$$

112 with

$$113 \quad \alpha_\infty(S_f) = \frac{1}{1 + e^{-100 * (-S_f + \alpha_{1/2})}}.$$

114

115 The parameters in function  $\alpha_\infty$  were chosen so that  $\alpha_\infty \approx 0$  if  $S_f > 0.2$  and  $\alpha_\infty(S_f) \approx$   
116 1 otherwise. In this way high feedback switches  $\alpha(t) \rightarrow 0$  over a timescale  $\tau_\alpha =$   
117 1000 msec. In this equation,  $\alpha_{1/2}$  is the half-maximal activation of  $\alpha$ . We set  $\alpha_{1/2} =$   
118 0.075 to allow gating of conductance regulation. Notice that using this parameter, we  
119 can switch between models with and without conductance regulation. If  $\alpha_{1/2} = -1$ ,  
120  $\alpha \rightarrow 0$  and there is no gating. If  $\alpha_{1/2} = 10$ , then  $\alpha \rightarrow 1$  and the regulation mechanism  
121 is always on.

122 We simulated the application of high potassium saline in the models by changing  
123 the equilibrium potential,  $E_K$ , of the potassium currents from -80mV (control) to -40mV  
124 (high potassium). In addition, we changed the reversal potential of the leak conductance  
125 from -50mV (control) to -40mV (high potassium) because the leak current is a non-  
126 specific cation current with a sizable potassium contribution.

127 All the equations and parameters of the sensors, and the activation functions are  
128 identical to those in Liu et al. (1998). The models were simulated using an exponential-  
129 Euler scheme with step  $dt = 0.1$  msec<sup>5</sup>. All simulations were performed in  
130 commercially available computers using python. Code to reproduce the simulations is  
131 available upon request.

132

### 133 **Generating multiple models**

134 We obtained multiple models by simulating equation (3) starting from small random  
135 initial conductances and allowing them to evolve under control conditions until they  
136 settled into their target bursting regimes.

137

138 **Statistics**

139 Statistical analysis and plotting were carried out using MATLAB 2020b built in  
140 functions for all analyses as described above. All electrophysiology analysis scripts are  
141 available at the Marder lab GitHub (<https://github.com/marderlab>).

142

143

144 **Work Cited**

145

- 146 1. Gutierrez, G.J. & Grashow, R.G. Cancer borealis stomatogastric nervous system  
147 dissection. *J. Vis. Exp. (JoVE)* (2009).
- 148 2. Hooper, S.L., Thuma, J.B., Guschlbauer, C., Schmidt, J. & Büschges, A. Cell dialysis by  
149 sharp electrodes can cause nonphysiological changes in neuron properties. *J. Neurophysiol.*  
150 **114**, 1255-1271 (2015).
- 151 3. Powell, D., Haddad, S.A., Gorur-Shandilya, S. & Marder, E. Coupling between fast and  
152 slow oscillator circuits in Cancer borealis is temperature-compensated. *eLife* **10**, e60454 (2021).
- 153 4. Hartigan, J.A. & Hartigan, P.M. The dip test of unimodality. *Ann. Stat.* **13**, 70-84 (1985).
- 154 5. Dayan, P. & Abbott, L.F. Theoretical neuroscience: computational and mathematical  
155 modeling of neural systems. *J. Cognit. Neurosci.* **15**, 154-155 (2003).

156
